# Supplementary material for: Effective Synthesis of Nucleosides Utilizing O-Acetyl-Glycosyl Chlorides as Glycosyl Donors in the Absence of Catalyst: Mechanism Revision and Application to Silyl-Hilbert-Johnson Reaction
Source: MDPI journal article supplement (doi:10.3390/molecules22010084), 2017-01-05

# Supplementary Materials: Effective Synthesis of Nucleosides Utilizing Acetyl-Glycosyl Chlorides as Glycosyl Donors in the Absence of Catalyst: Mechanism Revision and Application to Silyl-Hilbert-Johnson Reaction

Chengyuan Liang, Weihui Ju, Shunjun Ding, Han Sun and Gennian Mao

## 1. General

All substrates and solvents were commercially available and were purified before use. Reactions were carried out under N<sub>2</sub> using standard Schlenk techniques. Mass spectra were recorded on a mass spectrometer using electron impact ionization (EI) techniques. Compounds were visualized under UV lamp (254 nm). Column chromatography was performed on 100–200 mesh silica gel. Bruker Avance 300 MHz and Bruker Avance 75 MHz spectrometer was used to record for <sup>1</sup>H- and <sup>13</sup>C-NMR respectively, using tetramethylsilane ( $\delta = 0.00$ ) as an internal standard at 25 °C. <sup>1</sup>H- and <sup>13</sup>C-NMR spectra were also obtained on a Bruker Avance III 400 MHz NMR spectrometer. Mass spectra were recorded on a mass spectrometer using electron impact ionization (EI) techniques. Analytical TLC was carried out with plates pre-coated with silicagel 60 F<sub>254</sub> (0.25 mm thick). The identity of the products was established by comparing their physical and spectral data with those of reported compounds.

## 2. Analysis Data

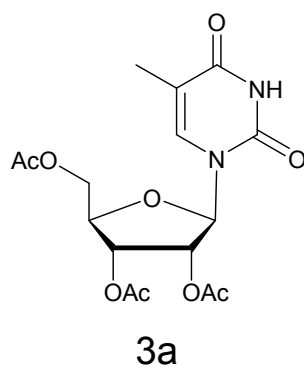

**3a:** (2*R*,3*R*,4*R*,5*R*)-2-(acetoxymethyl)-5-(5-methyl-2,4-dioxo-3,4-dihydropyrimidin-1(2*H*)-yl)tetrahydrofuran-3,4-diyl diacetate. <sup>1</sup>H-NMR (300 MHz, CDCl<sub>3</sub>, 303 K)  $\delta$ : 8.937 (1H, s), 7.102 (1H, d, *J* = 7.5 Hz), 6.088 (2H, d, *J* = 7.5 Hz), 5.462 (1H, d, *J* = 7.8 Hz), 5.362 (1H, d, *J* = 7.6 Hz), 4.358 (1H, s), 4.228 (1H, s), 2.346–2.079 (12H, m); <sup>13</sup>C-NMR (75 MHz, CDCl<sub>3</sub>, 303 K)  $\delta$ : 170.259, 163.775, 150.459, 136.571, 110.309, 96.571, 81.608, 71.608, 64.966, 21.608, 20.453, 9.356; HRMS (ESI) for (M + Na)<sup>+</sup>: calcd. 407.3380, found 407.3382.

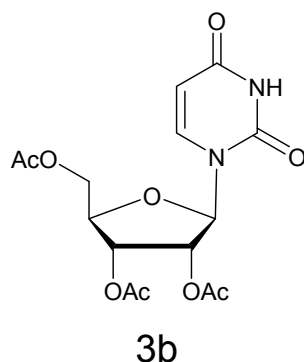

**3b:** (2*R*,3*R*,4*R*,5*R*)-2-(acetoxymethyl)-5-(2,4-dioxo-3,4-dihydropyrimidin-1(2*H*)-yl)tetrahydrofuran-3,4-diylldiacetate. <sup>1</sup>H-NMR (300 MHz, CDCl<sub>3</sub>, 303 K) δ: 8.782 (1H, s), 7.402 (1H, d, *J* = 7.4 Hz), 6.048 (1H, d), 5.816 (1H, d, *J* = 7.4 Hz), 5.346 (2H, d, *J* = 7.6 Hz), 4.324 (3H, m, *J* = 7.4 Hz), 2.099–2.066(9H, m); <sup>13</sup>C-NMR (75 MHz, DMSO-*d*<sub>6</sub>, 303 K) δ: 170.188, 163.303, 150.803, 140.200, 102.403, 96.898, 81.808, 75.336, 62.209, 20.898; HRMS (ESI) for (M + H)<sup>+</sup>: calcd. 371.6114, found 371.6115.

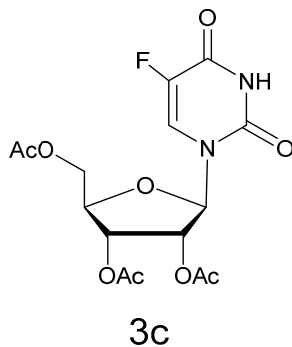

**3c:** (2*R*,3*R*,4*R*,5*R*)-2-(acetoxymethyl)-5-(5-fluoro-2,4-dioxo-3,4-dihydropyrimidin-1(2*H*)-yl)tetrahydrofuran-3,4-diylldiacetate. <sup>1</sup>H-NMR (300 MHz, CDCl<sub>3</sub>, 303 K) δ: 10.005 (1H, s), 8.105 (1H, s), 6.468 (1H, d, *J* = 7.5 Hz), 6.298 (1H, d, *J* = 7.5 Hz), 5.575–5.346 (2H, m, *J* = 7.4 Hz), 4.364–4.250 (2H, m, *J* = 7.8 Hz), 2.096–2.041 (9H, m); <sup>13</sup>C-NMR (75 MHz, DMSO-*d*<sub>6</sub>) δ: 170.188, 158.303, 150.803, 140.200, 128.803, 96.898, 81.808, 75.336, 62.209, 20.898; HRMS (ESI) for (M + Na)<sup>+</sup>: calcd. 411.1109, found 411.1121.

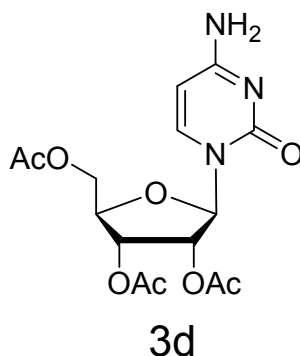

**3d:** (2*R*,3*R*,4*R*,5*R*)-2-(acetoxymethyl)-5-(4-amino-2-oxopyrimidin-1(2*H*)-yl)tetrahydrofuran-3,4-diylldiacetate. <sup>1</sup>H-NMR (300 MHz, CDCl<sub>3</sub>, 303 K) δ: 8.059 (1H, s), 6.785 (2H, s), 6.325 (1H, d), 6.285 (1H, d), 5.342–4.902 (3H, m, *J* = 7.8 Hz), 4.339–4.018 (2H, m, *J* = 7.6 Hz), 2.131–2.059 (9H, m); <sup>13</sup>C-NMR (75 MHz, DMSO-*d*<sub>6</sub>, 303 K) δ: 170.369, 165.337, 155.497, 143.535, 95.995, 94.020, 81.990, 75.525, 74.073, 62.243, 21.382; HRMS (ESI) for (M + H)<sup>+</sup>: calcd. 370.2413, found 370.2415.

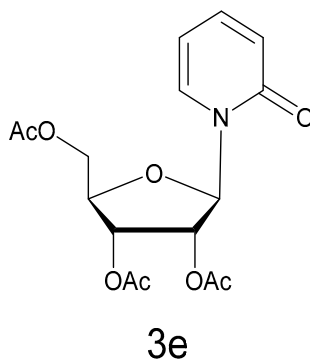

**3e:** (2*R*,3*R*,4*R*,5*R*)-2-(acetoxymethyl)-5-(2-oxopyridin-1(2*H*)-yl)tetrahydrofuran-3,4-diylldiacetate. <sup>1</sup>H-NMR (300 MHz, CDCl<sub>3</sub>, 303 K) δ: 8.030 (1H, s), 7.507 (1H, m, *J* = 7.3 Hz), 7.093 (1H, d), 6.493 (2H, m, *J* = 7.3

Hz), 5.161 (1H, t,  $J = 7.6$  Hz), 4.972–4.925 (2H, m,  $J = 7.6$  Hz), 3.761–3.581 (2H, m,  $J = 7.8$  Hz), 2.020–1.835 (9H, m);  $^{13}\text{C}$ -NMR (75 MHz,  $\text{CDCl}_3$ , 303 K)  $\delta$ : 170.937, 160.948, 140.936, 140.635, 134.955, 106.605, 94.241, 82.159, 70.936, 70.848, 62.506, 20.828, 20.605; HRMS (ESI) for  $(\text{M} + \text{H})^+$ : calcd. 354.3240, found 354.3242.

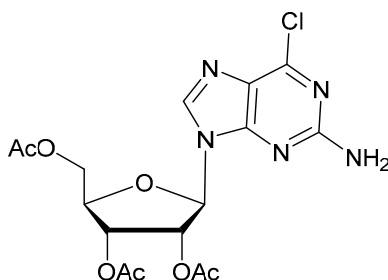

3f

**3f:** (2*R*,3*S*,4*S*,5*R*)-2-(acetoxymethyl)-5-(2-amino-6-chloro-9*H*-purin-9-yl)tetrahydrofuran-3,4-diyl diacetate.  $^1\text{H}$ -NMR (300 MHz,  $\text{CDCl}_3$ , 303 K)  $\delta$ : 8.120 (1H, s), 6.242 (2H, s), 5.342–5.218 (2H, m,  $J = 7.3$  Hz), 4.902 (1H, d,  $J = 7.4$  Hz), 4.380–4.080 (2H, m,  $J = 7.4$  Hz), 2.171–2.059 (9H, m).  $^{13}\text{C}$ -NMR (75 MHz,  $\text{CDCl}_3$ , 303 K)  $\delta$ : 170.084, 159.684, 148.024, 148.004, 131.565, 95.491, 81.540, 71.455, 72.5, 20.307; HRMS (ESI) for  $(\text{M} + \text{Na})^+$ : calcd. 450.7964, found 450.7966.

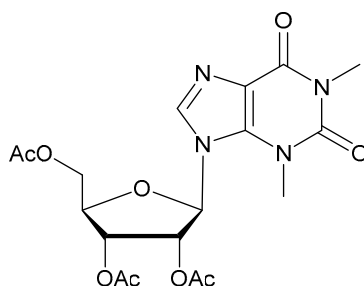

3g

**3g:** (2*R*,3*R*,4*R*,5*R*)-2-(acetoxymethyl)-5-(1,3-dimethyl-2,6-dioxo-1,2,3,6-tetrahydro-9*H*-purin-9-yl)tetrahydrofuran-3,4-diyl diacetate.  $^1\text{H}$ -NMR (300 MHz,  $\text{CDCl}_3$ , 303 K)  $\delta$ : 8.120 (1H, s), 6.780 (1H, d,  $J = 8.1$  Hz), 5.342–5.218 (2H, m,  $J = 7.4$  Hz), 4.902 (1H, s), 4.389–4.080 (2H, m,  $J = 8.1$  Hz), 3.449–3.349 (6H, m,  $J = 7.4$  Hz), 2.136–2.059 (9H, m);  $^{13}\text{C}$ -NMR (75 MHz,  $\text{DMSO}-d_6$ , 303 K)  $\delta$ : 170.627, 151.585, 150.538, 135.038, 107.238, 88.208, 80.223, 73.181, 72.203, 62.039, 29.939, 28.935, 19.981, 19.039; HRMS (ESI) for  $(\text{M} + \text{H})^+$ : calcd. 439.3887, found 439.3889.

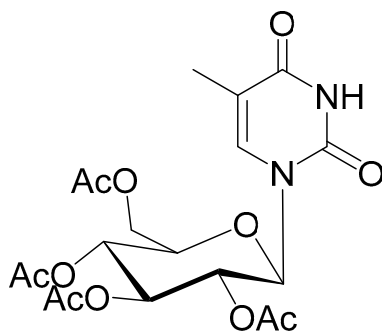

3h

**3h:** (2*R*,3*R*,4*S*,5*R*,6*R*)-2-(acetoxymethyl)-6-(5-methyl-2,4-dioxo-3,4-dihydropyrimidin-1(2*H*)-yl)tetrahydro-2*H*-pyran-3,4,5-triyl triacetate. <sup>1</sup>H-NMR (300 MHz, CDCl<sub>3</sub>, 303 K) δ: 8.336(1H, s), 7.118 (1H, d, *J* = 1.2 Hz), 5.841 (1H, d, *J* = 8.9 Hz), 5.541–5.520 (2H, m, *J* = 7.9 Hz), 4.192–4.055 (2H, m), 2.094–1.697 (15H, m); <sup>13</sup>C-NMR (75 MHz, DMSO-*d*<sub>6</sub>, 303 K) δ: 170.627, 162.585, 150.538, 110.238, 85.208, 75.223, 66.123, 63.439, 62.039, 20.519, 19.039, 14.123; HRMS (ESI) for (M + H)<sup>+</sup>: calcd. 457.4007, found 457.4010.

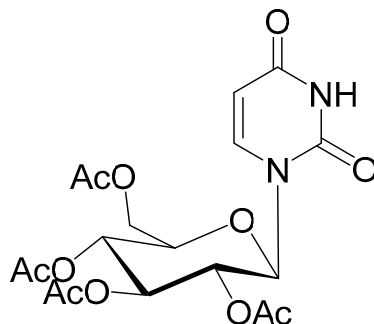

3i

**3i:** (2*R*,3*R*,4*S*,5*R*,6*R*)-2-(acetoxymethyl)-6-(2,4-dioxo-3,4-dihydropyrimidin-1(2*H*)-yl)tetrahydro-2*H*-pyran-3,4,5-triyl triacetate. <sup>1</sup>H-NMR (300 MHz, CDCl<sub>3</sub>, 303 K) δ: 9.161 (1H, s), 9.396 (1H, d), 7.412 (1H, d, *J* = 8.2 Hz), 5.831 (2H, d), 5.581 (1H, s), 5.283–2.208 (2H, m, *J* = 8.1 Hz), 4.280–4.158 (3H, m, *J* = 7.5 Hz), 2.139–2.007 (12H, m); <sup>13</sup>C-NMR (75 MHz, DMSO-*d*<sub>6</sub>, 303 K) δ: 170.445, 170.133, 170.016, 163.045, 150.845, 140.736, 102.436, 86.261, 72.223, 71.942, 69.161, 68.515, 20.774, 20.382; HRMS (ESI) for (M + Na)<sup>+</sup>: calcd. 465.3741, found 465.3743.

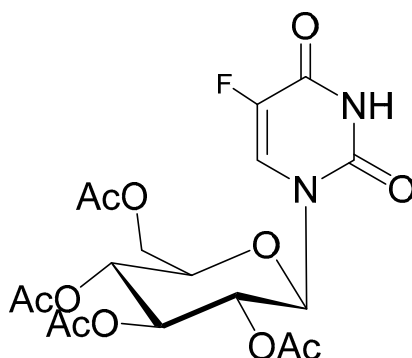

3j

**3j:** (2*R*,3*R*,4*S*,5*R*,6*R*)-2-(acetoxymethyl)-6-(5-fluoro-2,4-dioxo-3,4-dihydropyrimidin-1(2*H*)-yl)tetrahydro-2*H*-pyran-3,4,5-triyl triacetate. <sup>1</sup>H-NMR (300 MHz, CDCl<sub>3</sub>, 303 K) δ: 10.581 (1H, s), 7.604 (1H, d), 6.117 (1H, d), 5.313–5.248 (2H, m), 4.380–4.117 (4H, m, *J* = 7.8 Hz), 2.139–2.007 (12H, m); <sup>13</sup>C-NMR (75 MHz, DMSO-*d*<sub>6</sub>, 303 K) δ: 170.434, 158.124, 150.372, 140.407, 127.937, 86.209, 74.327, 67.084, 66.962, 64.089, 63.609, 20.104, 20.099; HRMS (ESI) for (M + Na)<sup>+</sup>: calcd. 483.3645, found 483.3647.

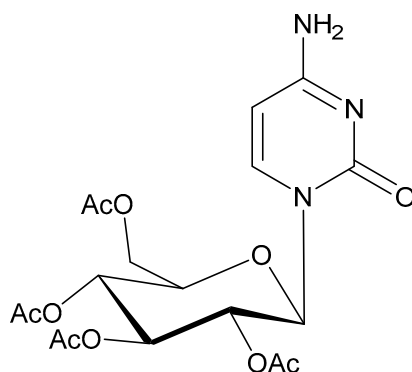**3k**

**3k:** (2*R*,3*R*,4*S*,5*R*,6*R*)-2-(acetoxymethyl)-6-(4-amino-2-oxypyrimidin-1(2*H*)-yl)tetrahydro-2*H*-pyran-3,4,5-triyl triacetate. <sup>1</sup>H-NMR (300 MHz, CDCl<sub>3</sub>, 303 K) δ: 8.032 (1*H*, d), 6.361 (2*H*, s), 6.144 (1*H*, d), 6.036 (2*H*, d, *J* = 7.8 Hz), 5.352 (1*H*, s), 5.159 (1*H*, d), 4.275–3.926 (2*H*, m, *J* = 7.8 Hz), 2.016–1.861 (12*H*, m); <sup>13</sup>C-NMR (75 MHz, DMSO-*d*<sub>6</sub>, 303 K) δ: 170.369, 165.337, 155.497, 143.535, 94.020, 90.995, 90.673, 87.523, 65.525, 64.073, 15.382; HRMS (ESI) for (M + Na)<sup>+</sup>: calcd. 464.3893, found 464.3899.

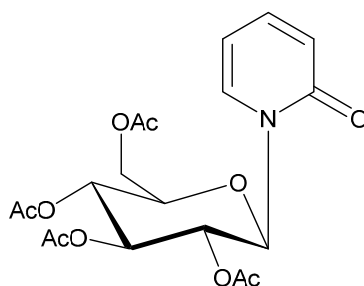**3l**

**3l:** (2*R*,3*R*,4*S*,5*R*,6*R*)-2-(acetoxymethyl)-6-(2-oxopyridin-1(2*H*)-yl)tetrahydro-2*H*-pyran-3,4,5-triyl triacetate. <sup>1</sup>H-NMR (300 MHz, CDCl<sub>3</sub>, 303 K) δ: 8.271 (1*H*, d), 8.163 (1*H*, d), 7.745–7.716 (1*H*, t), 6.161 (1*H*, s), 6.091 (1*H*, s), 5.330–5.013 (4*H*, m, *J* = 7.9 Hz), 4.331–4.050 (2*H*, m, *J* = 8.0 Hz), 2.176–1.975 (12*H*, m); <sup>13</sup>C-NMR (75 MHz, DMSO-*d*<sub>6</sub>, 303 K) δ: 170.260, 160.721, 139.384, 137.023, 132.421, 110.721, 102.260, 91.319, 77.052, 63.575, 62.887, 62.044, 21.574, 20.863; HRMS (ESI) for (M + H)<sup>+</sup>: calcd. 426.3866, found 426.3867.

#### 4. Capecitabine

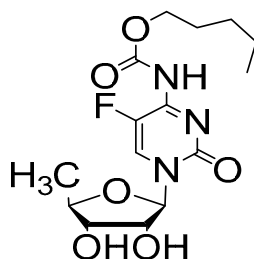**Capecitabine**

<sup>1</sup>H-NMR (300 MHz, DMSO-*d*<sub>6</sub>, 303 K) δ: 8.04(1*H*, s), 5.66(1*H*, d), 5.42 (1*H*, m, *J* = 7.5 Hz), 5.06 (1*H*, m, *J* = 7.5 Hz), 4.07 (1*H*, m), 3.82 (1*H*, m, *J* = 7.4 Hz), 3.66 (2*H*, m, *J* = 7.4 Hz), 3.49 (2*H*, s), 2.50 (2*H*, m), 1.65 (4*H*, m), 1.32 (3*H*, m), 0.9 (3*H*, m); <sup>13</sup>C-NMR (75 MHz, DMSO-*d*<sub>6</sub>, 303 K) δ: 160.60, 155.17, 154.04,

126.02, 100.63, 99.20, 85.28, 79.20, 74.04, 65.38, 27.85, 27.39, 21.73, 18.23, 13.82; HRMS (ESI) for (M + H)<sup>+</sup>: calcd. 360.2501, found 360.2504.

## 5. Hydrogen Spectrum

### 5.1. <sup>1</sup>H-NMR of **3a**

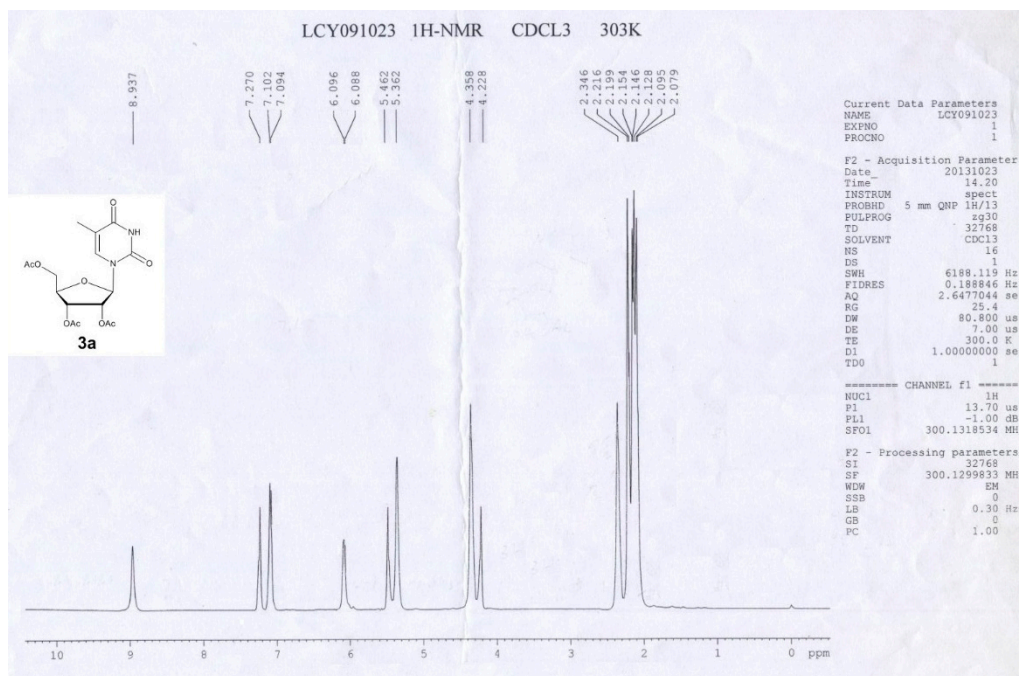

### 5.2. <sup>1</sup>H-NMR of **3b**

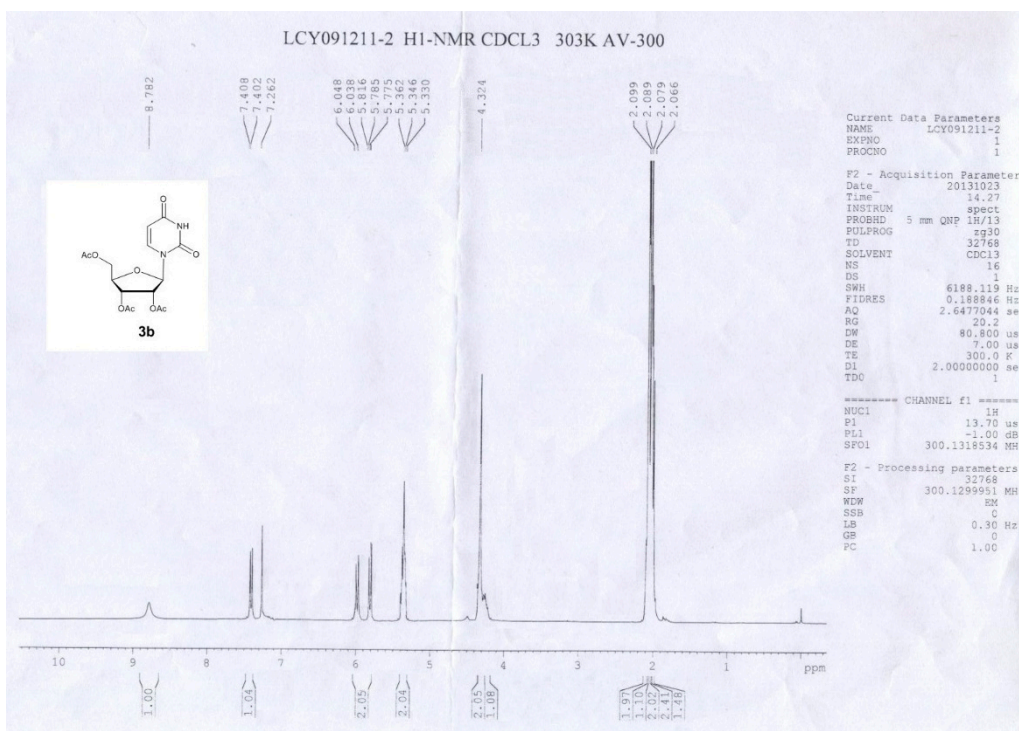

5.3.  $^1\text{H}$ -NMR of **3c**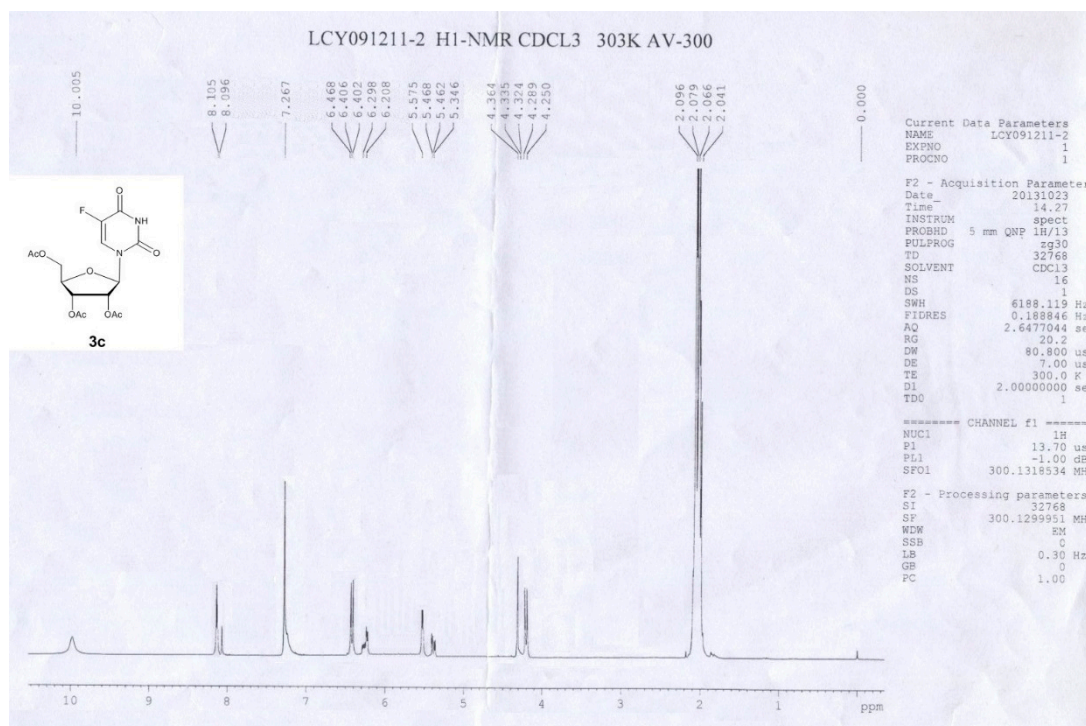5.4.  $^1\text{H}$ -NMR of **3d**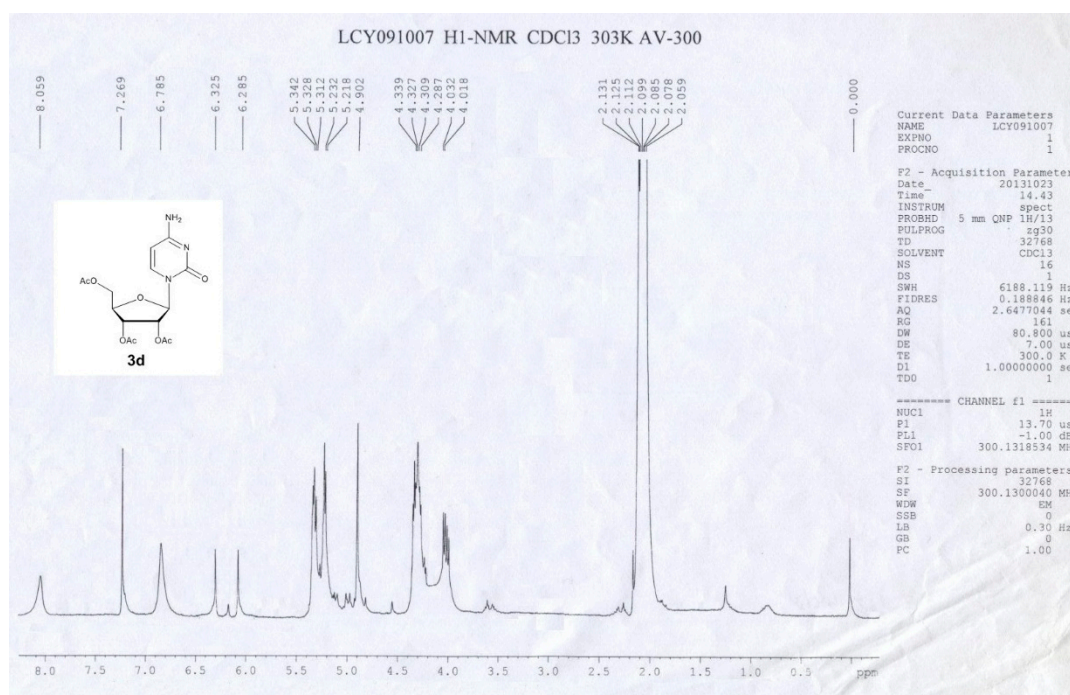

5.5.  $^1\text{H}$ -NMR of **3e**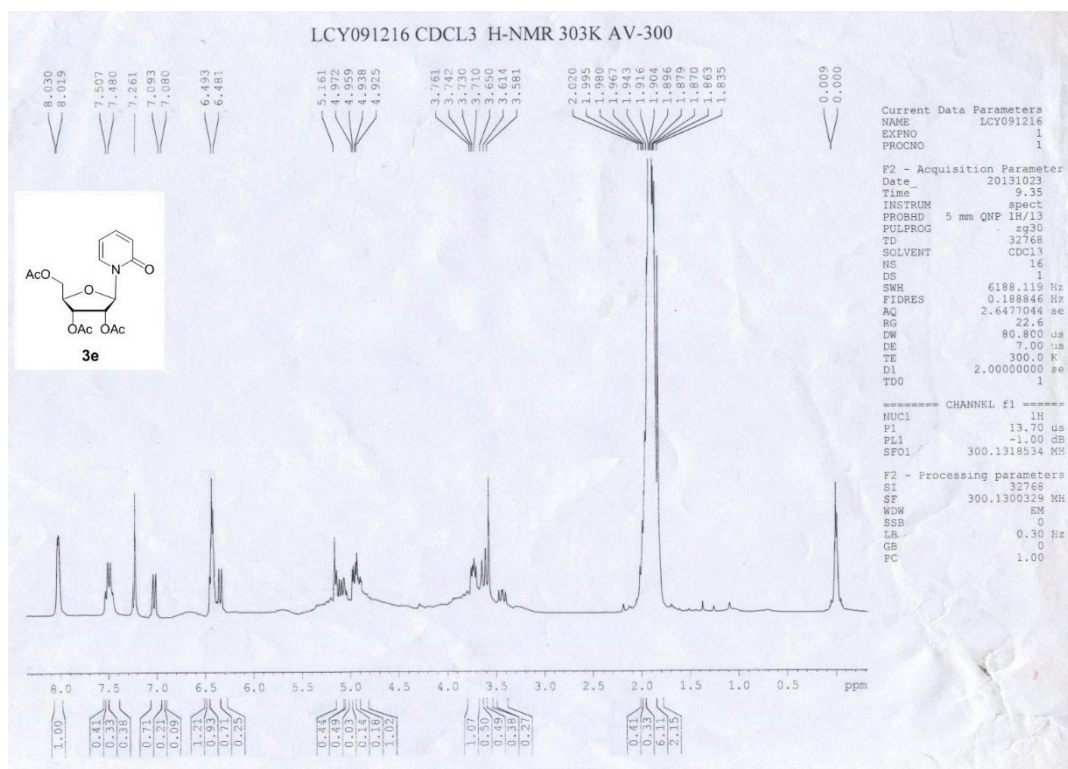5.6.  $^1\text{H}$ -NMR of **3f**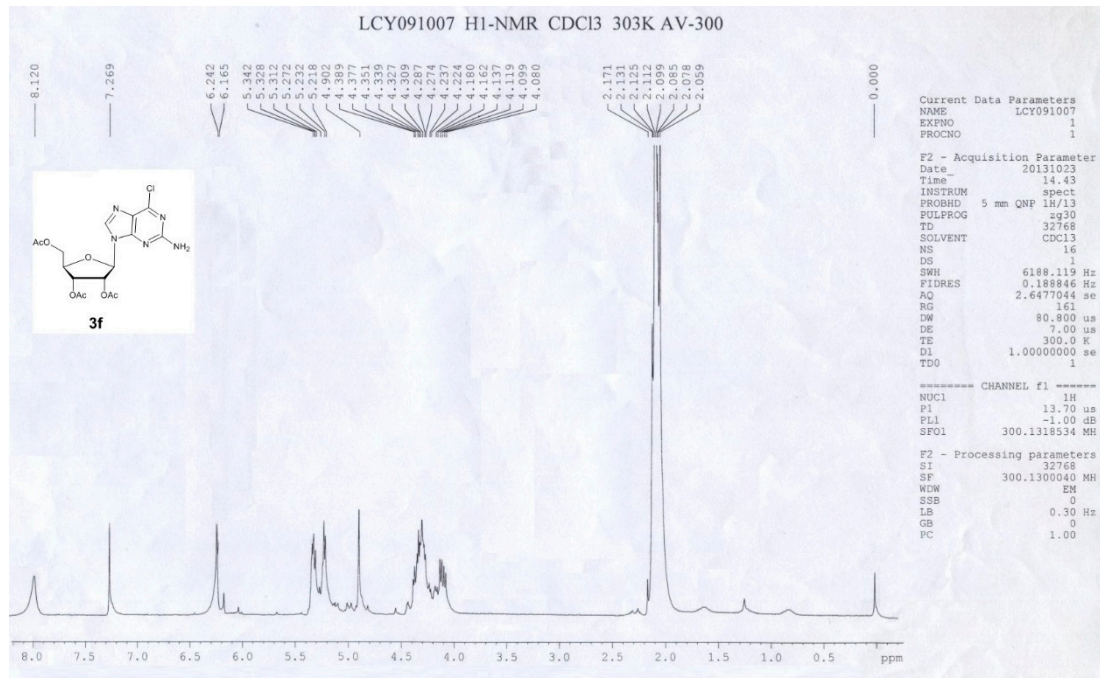

5.7.  $^1\text{H}$ -NMR of **3g**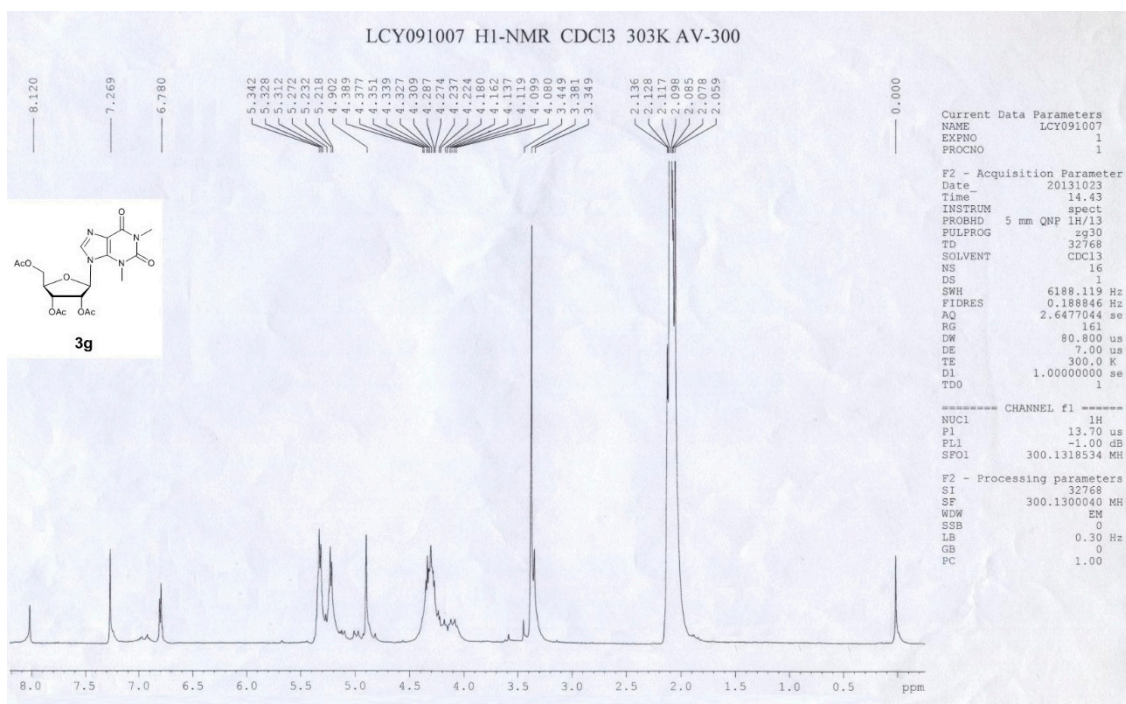5.8.  $^1\text{H}$ -NMR of **3h**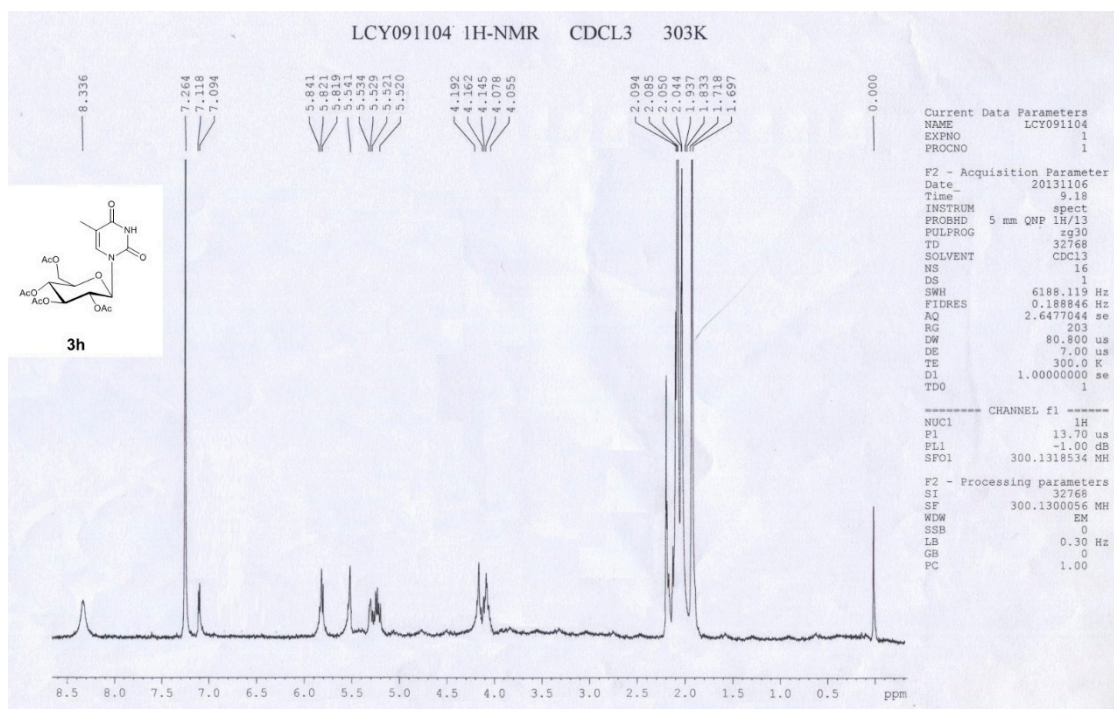

5.9.  $^1\text{H}$ -NMR of **3i**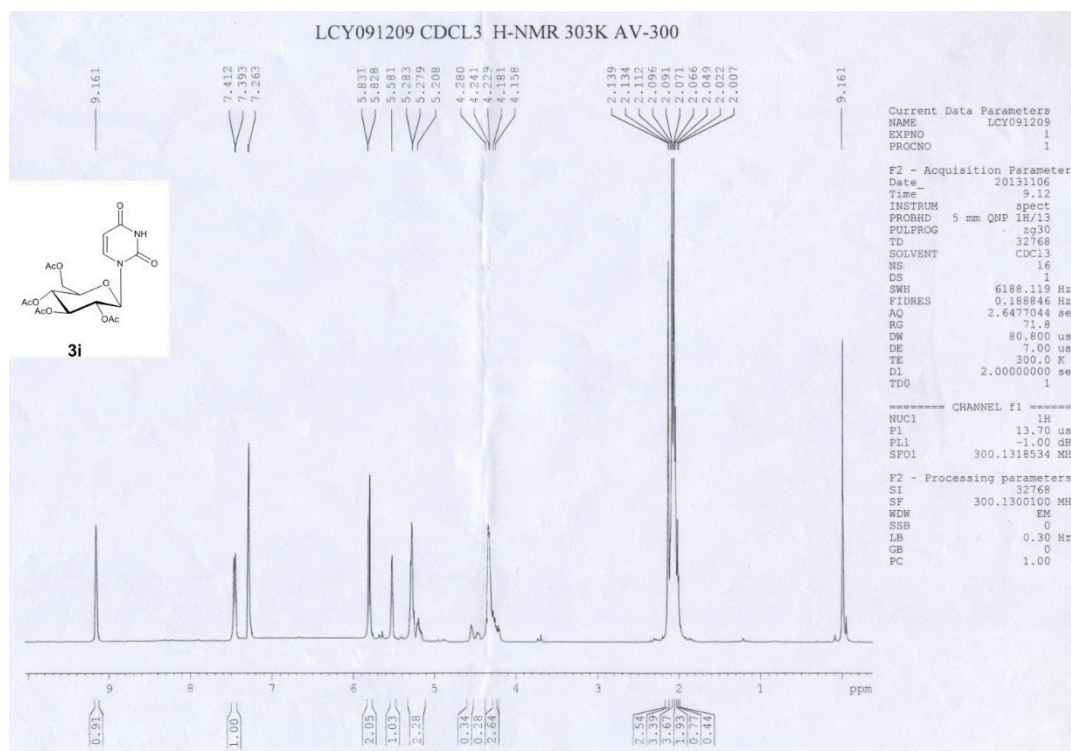5.10.  $^1\text{H}$ -NMR of **3j**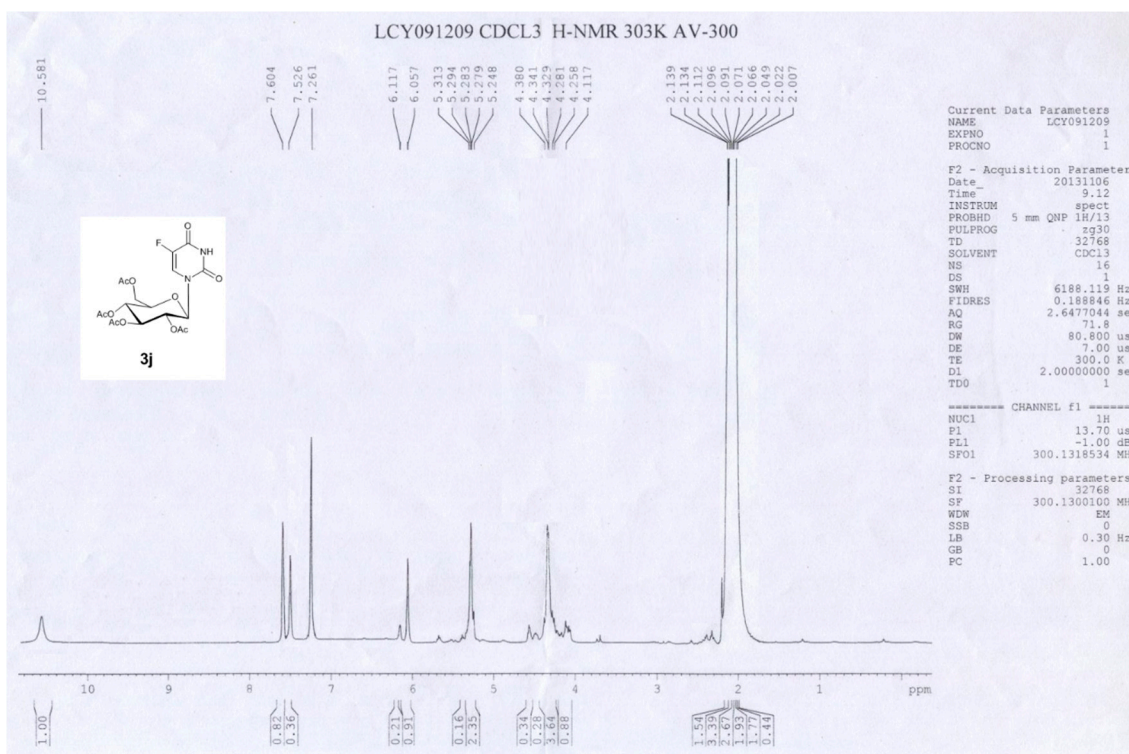

LCY091215 CDCL<sub>3</sub> H-NMR 303K AV-300

**3k**

ppm

**Current Data Parameters**

|        |           |
|--------|-----------|
| NAME   | LCY091215 |
| EXPNO  | 1         |
| PROCNO | 1         |

**F2 - Acquisition Parameters**

|         |                |
|---------|----------------|
| Date_   | 20131106       |
| Time    | 9.41           |
| INSTRUM | spect          |
| PROBHD  | 5 mm QNP 1H/13 |
| PULPROG | zg30           |
| TD      | 32768          |
| SOLVENT | CDCL3          |
| NS      | 16             |
| DS      | 1              |
| SWH     | 6188.119 Hz    |
| FIDRES  | 0.188846 Hz    |
| AQ      | 2.6477044 sec  |
| RG      | 50.8           |
| DW      | 80.800 usec    |
| DE      | 7.00 usec      |
| TE      | 300.0 K        |
| D1      | 2.00000000 sec |
| TD0     | 1              |

===== CHANNEL f1 =====

|      |                 |
|------|-----------------|
| NUC1 | 1H              |
| P1   | 13.70 usec      |
| PL1  | -1.00 dB        |
| SFO1 | 300.1318534 MHz |

**F2 - Processing parameters**

|     |                 |
|-----|-----------------|
| SI  | 32768           |
| SF  | 300.1300416 MHz |
| WDW | EM              |
| SSB | 0               |
| LB  | 0.30 Hz         |
| GB  | 0               |
| PC  | 1.00            |

LCY091011 H1-NMR CDCl<sub>3</sub> 303K AV-300

**31**

Current Data Parameters

| F2 - Acquisition Parameters |                   |
|-----------------------------|-------------------|
| NAME                        | LCY091011         |
| EXPNO                       | 1                 |
| PROCNO                      | 1                 |
| F2 - Acquisition Parameters |                   |
| Date_                       | 20131106          |
| Time                        | 9.32              |
| INSTRUM                     | spect             |
| PROBHD                      | 5 mm QNP 1H/13    |
| PULPROG                     | zg30              |
| TD                          | 32768             |
| SOLVENT                     | CDCl <sub>3</sub> |
| NS                          | 16                |
| DS                          | 1                 |
| SWH                         | 6188.119 Hz       |
| FIDRES                      | 0.188846 Hz       |
| AQ                          | 2.6477044 s       |
| RG                          | 71.8              |
| DW                          | 80.800 us         |
| DE                          | 7.00 us           |
| TE                          | 300.0 K           |
| D1                          | 1.00000000 s      |
| TD0                         | 1                 |
| ===== CHANNEL f1 =====      |                   |
| NUC1                        | 1H                |
| P1                          | 13.70 us          |
| PL1                         | -1.00 dB          |
| SFO1                        | 300.1318534 MHz   |
| F2 - Processing parameters  |                   |
| SI                          | 32768             |
| SF                          | 300.1300167 MHz   |
| WDW                         | EM                |
| SSB                         | 0                 |
| LB                          | 0.30 Hz           |
| GB                          | 0                 |
| PC                          | 1.00              |

5.13.  $^1\text{H}$ -NMR of Capecitabine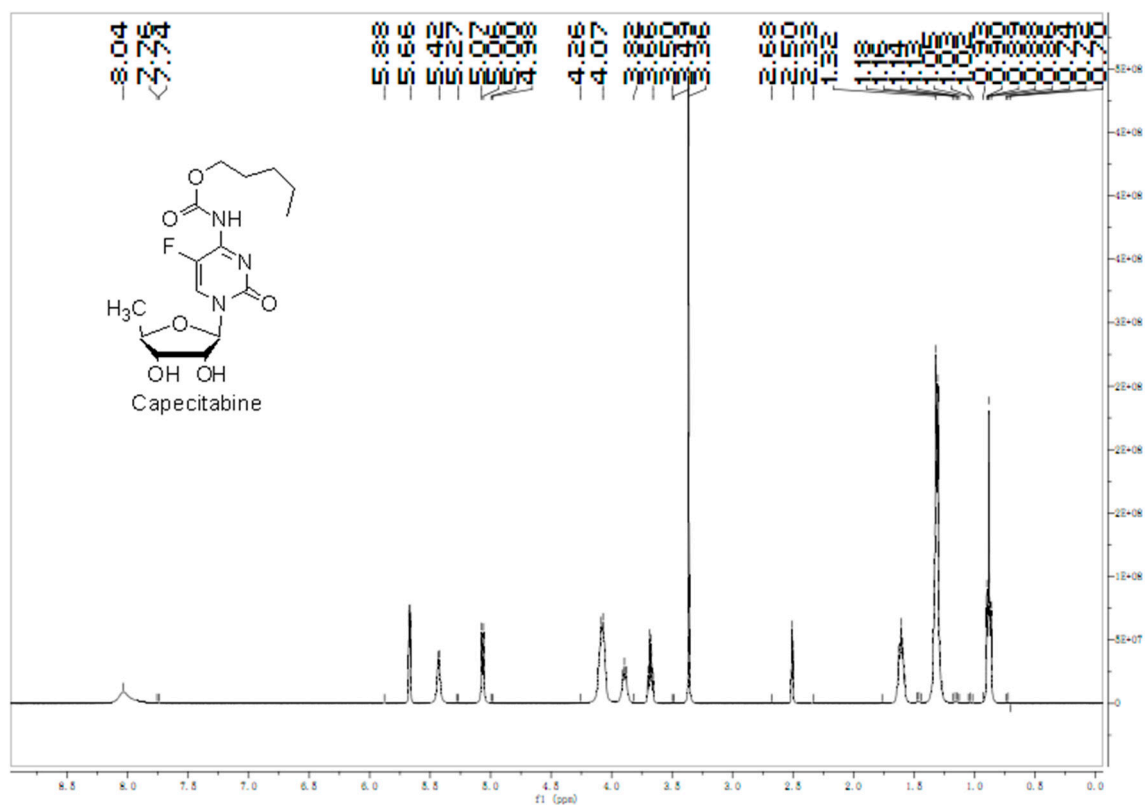

## 6. Carbon Spectrum

6.1.  $^{13}\text{C}$ -NMR of 3a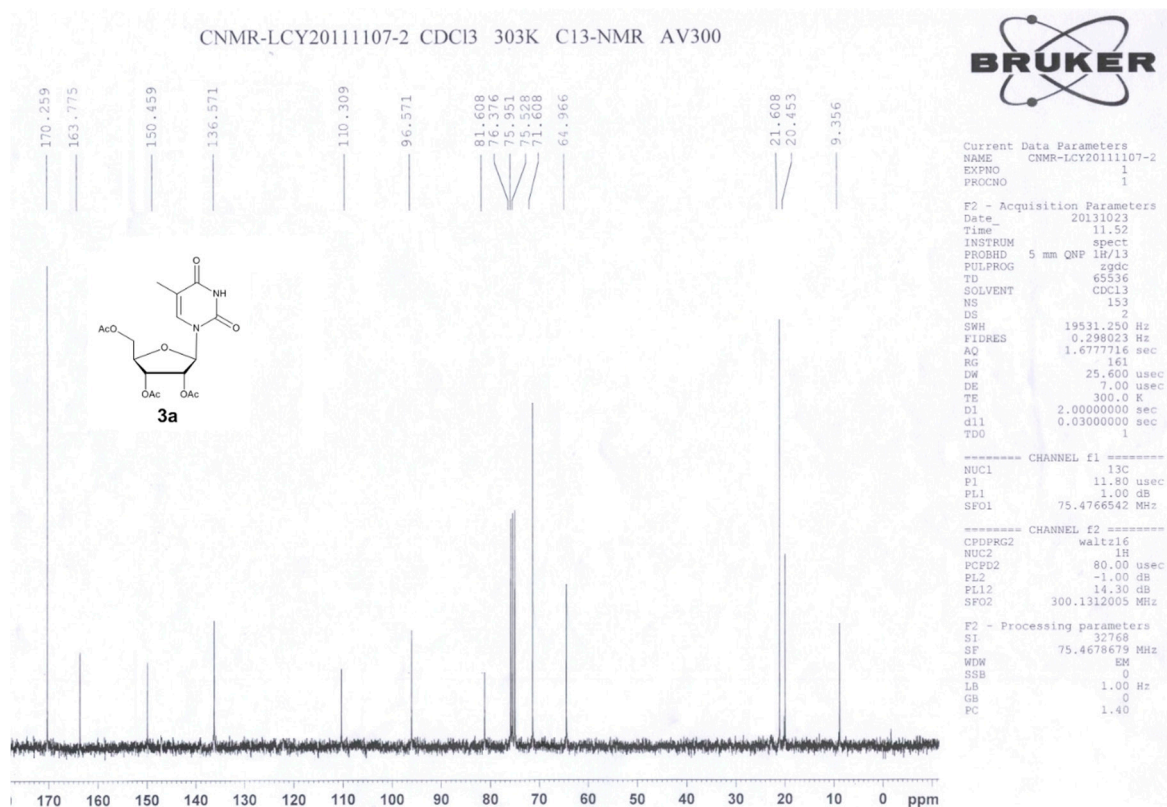

6.2.  $C^{13}$ -NMR of **3b**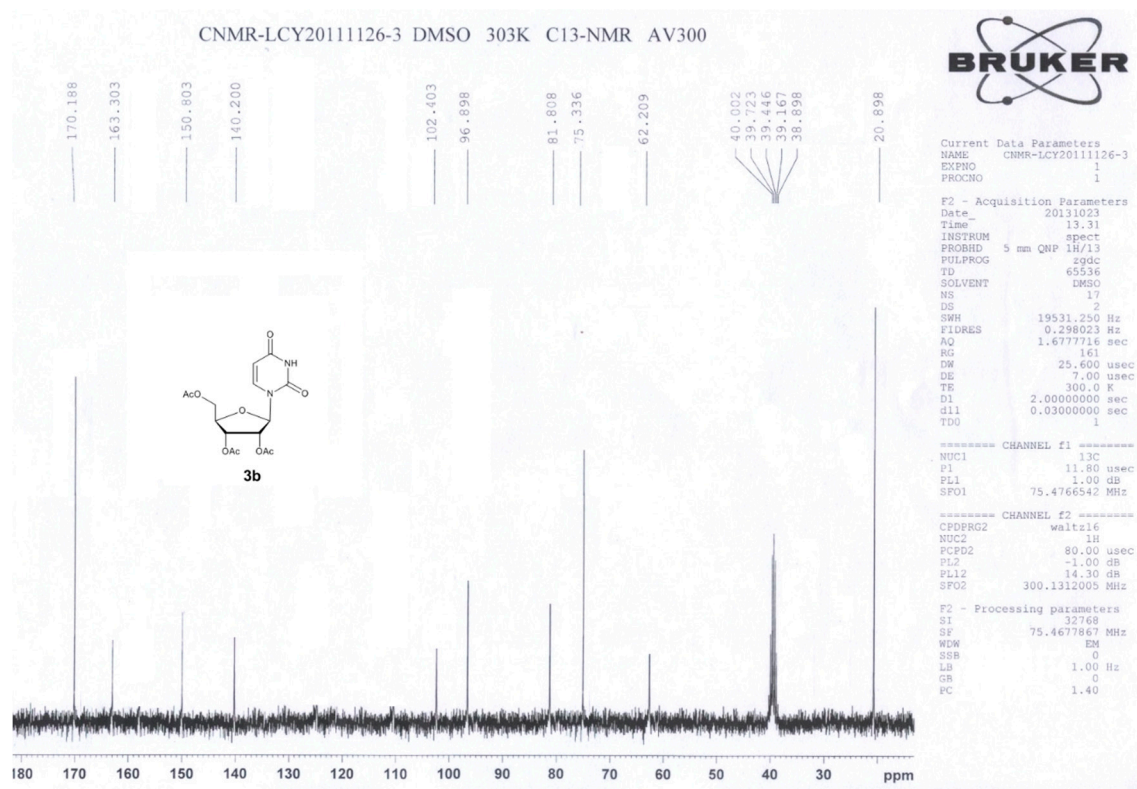6.3.  $C^{13}$ -NMR of **3c**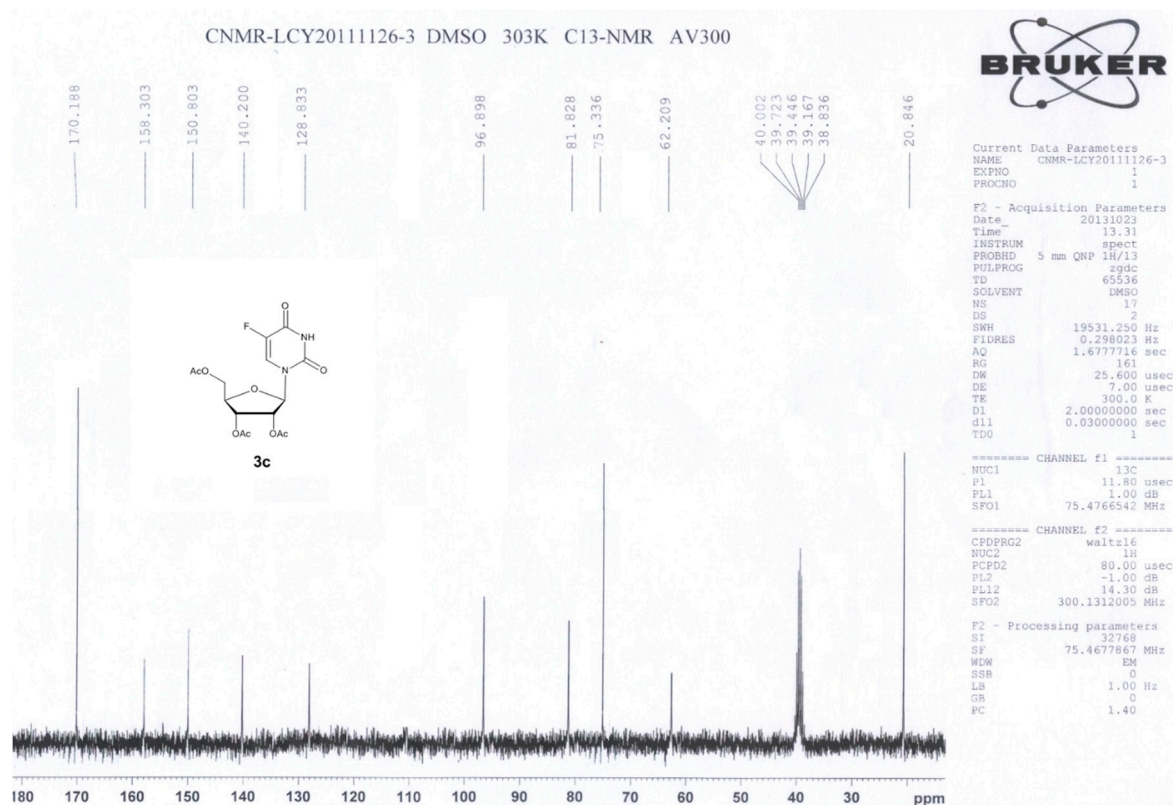

6.4.  $C^{13}$ -NMR of **3d**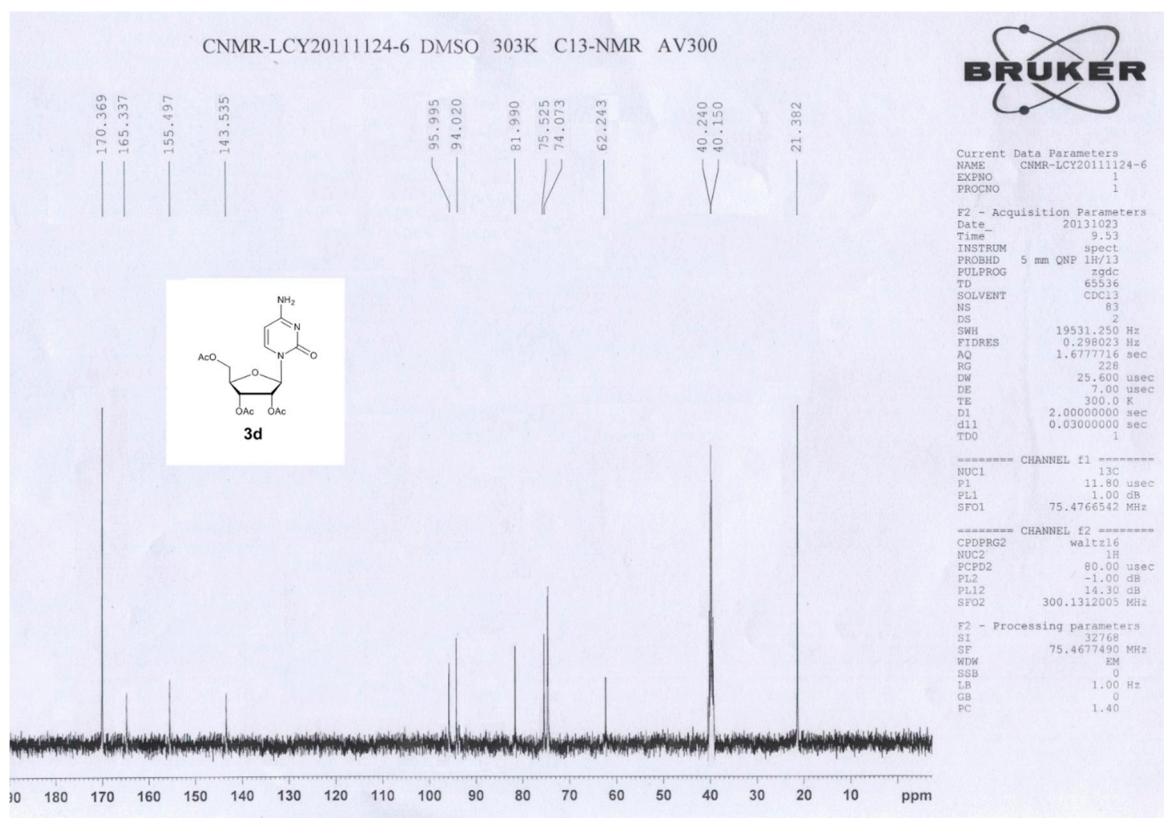6.5.  $C^{13}$ -NMR of **3e**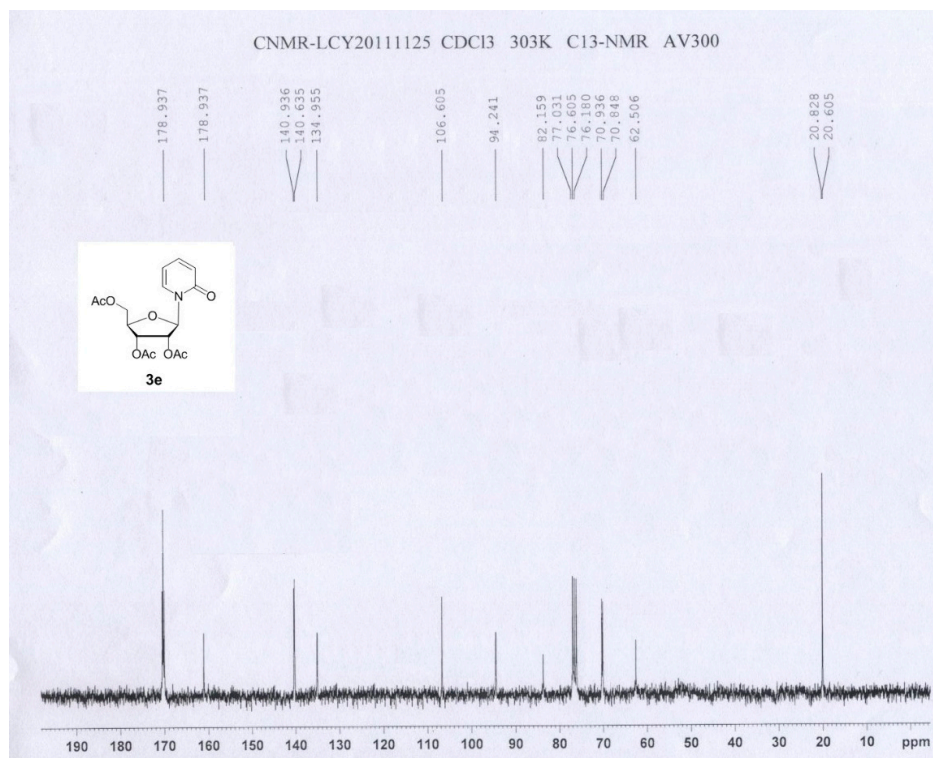

6.6.  $C^{13}$ -NMR of **3f**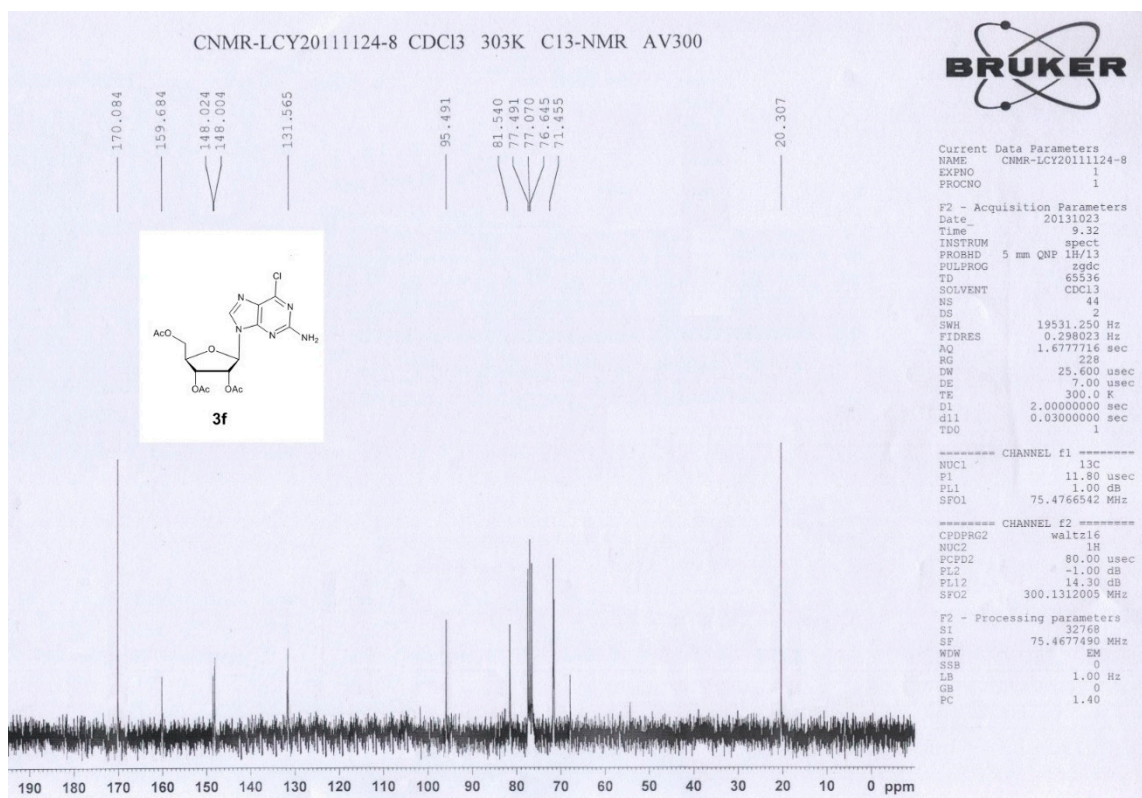6.7.  $C^{13}$ -NMR of **3g**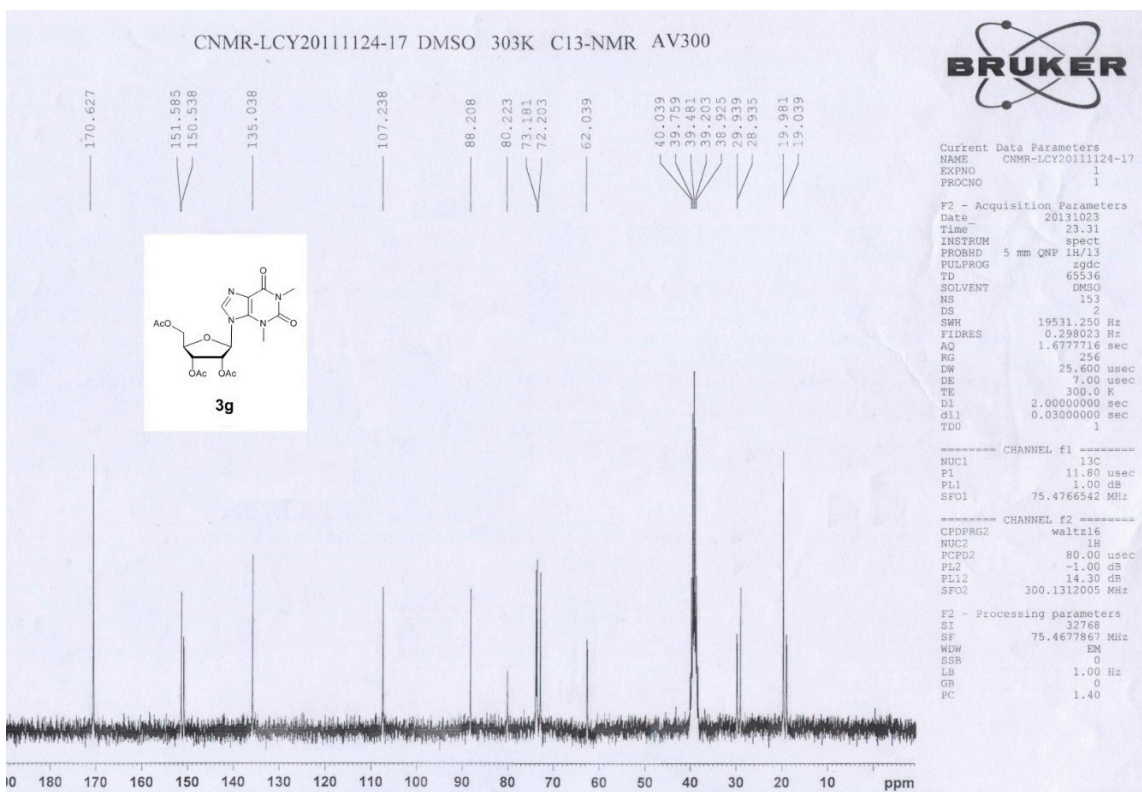

6.8.  $C^{13}$ -NMR of **3h**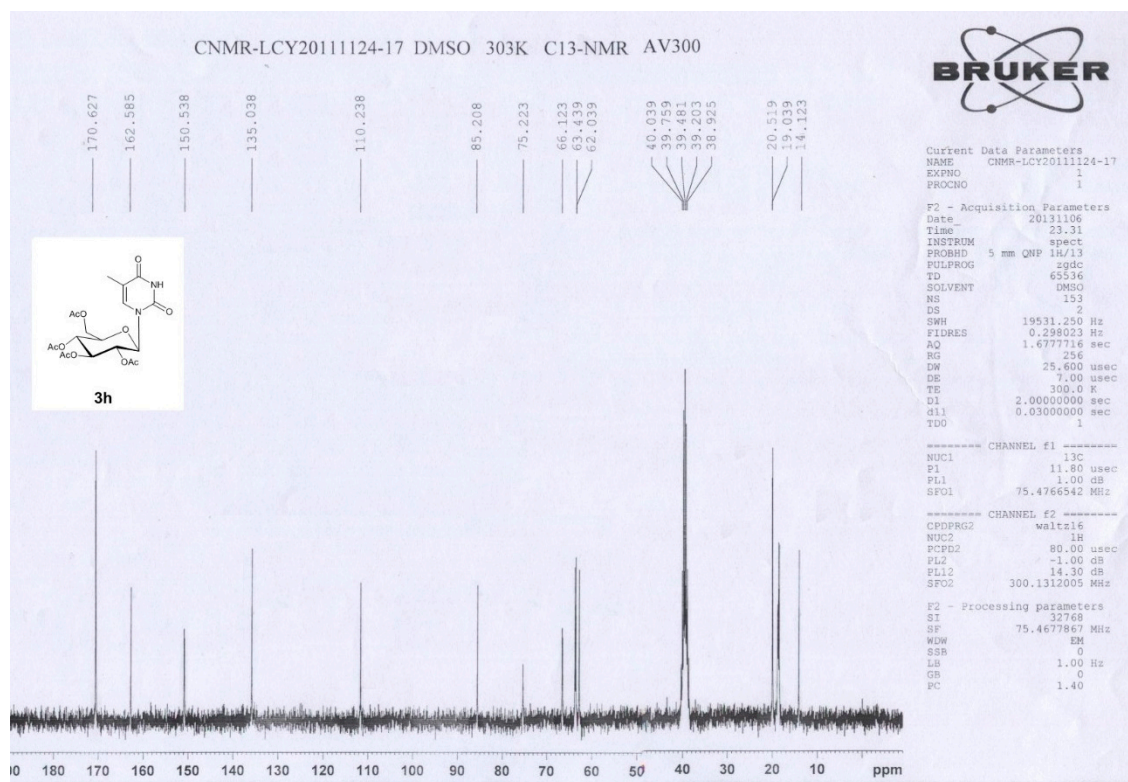6.9.  $C^{13}$ -NMR of **3i**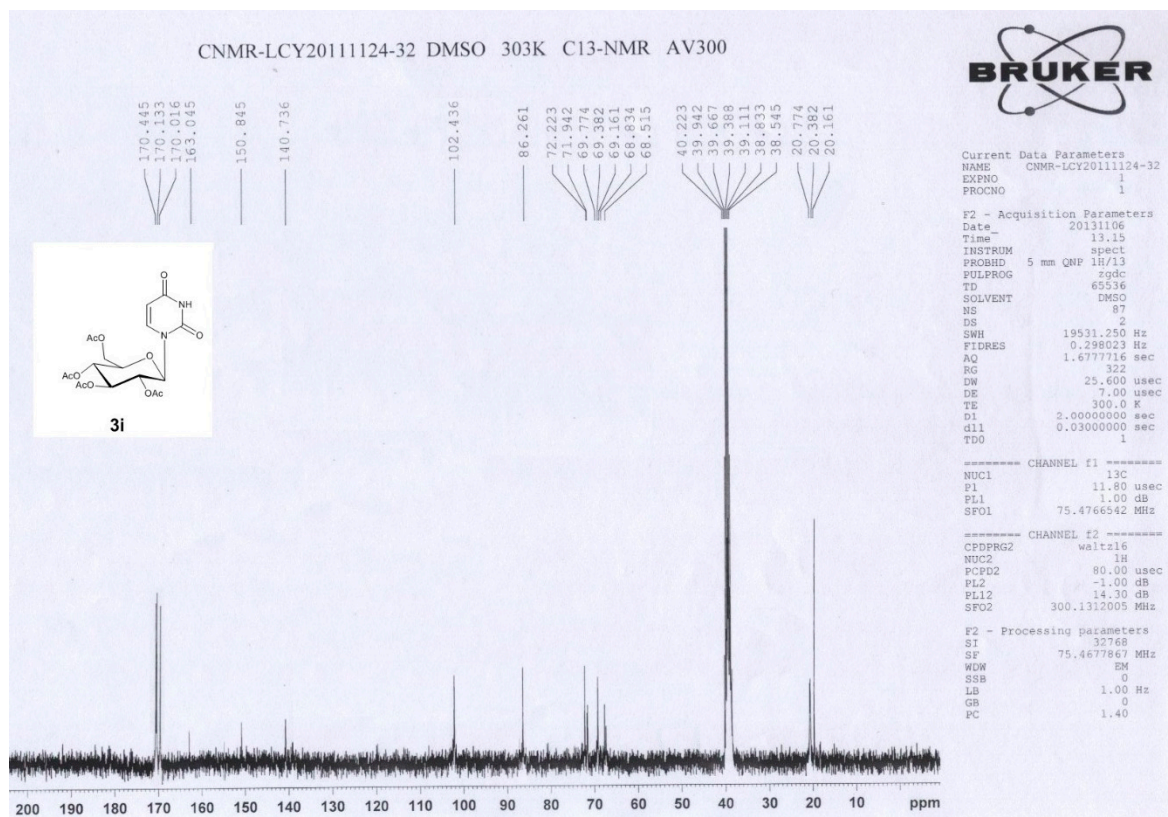

6.10.  $C^{13}$ -NMR of **3j**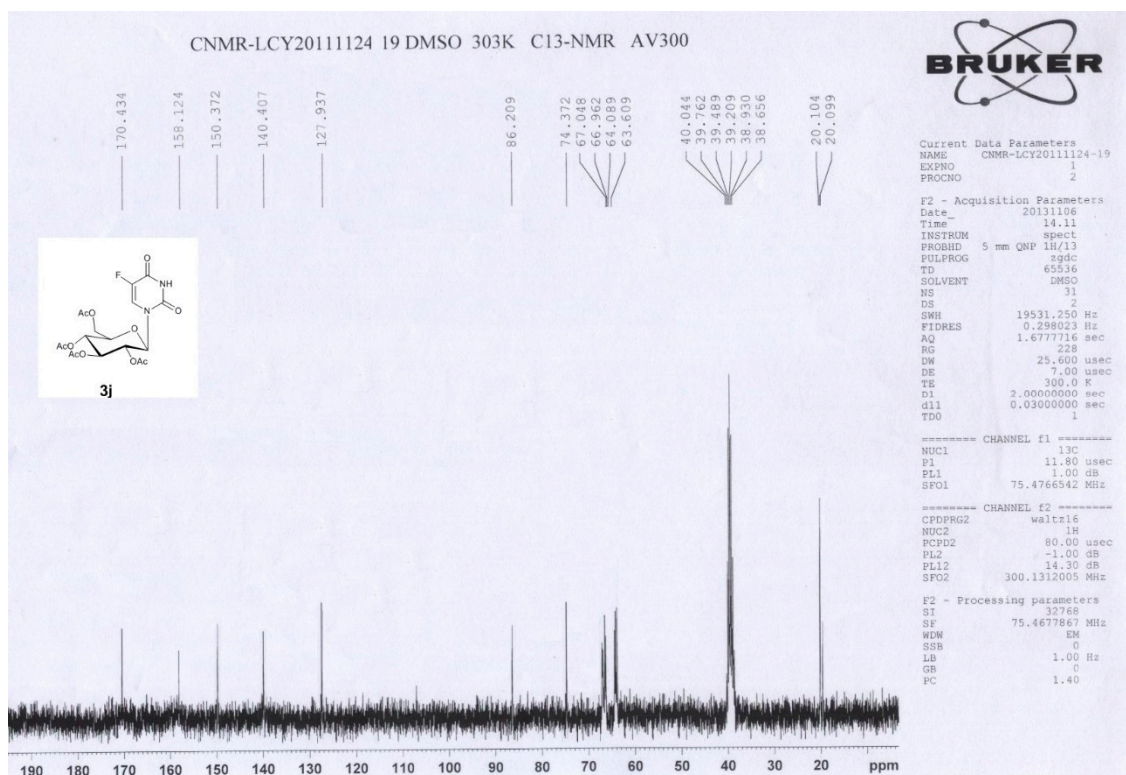6.11.  $C^{13}$ -NMR of **3k**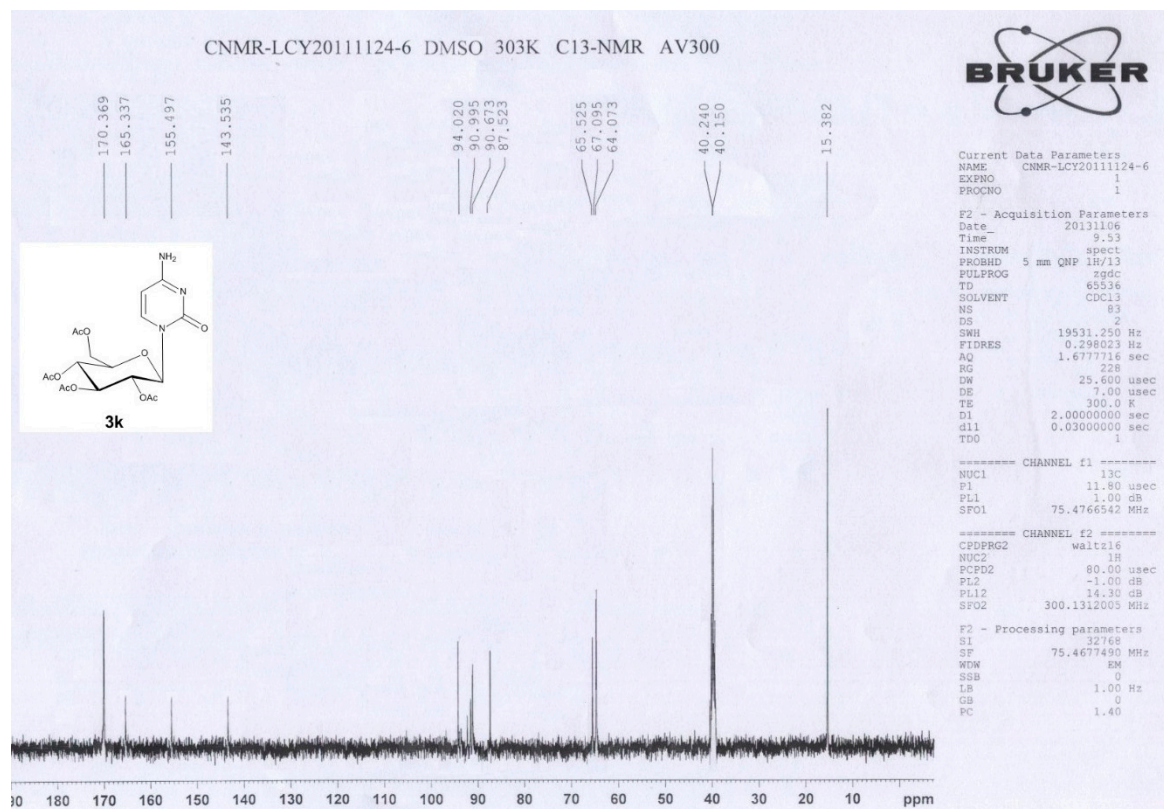

6.12.  $C^{13}$ -NMR of **3l**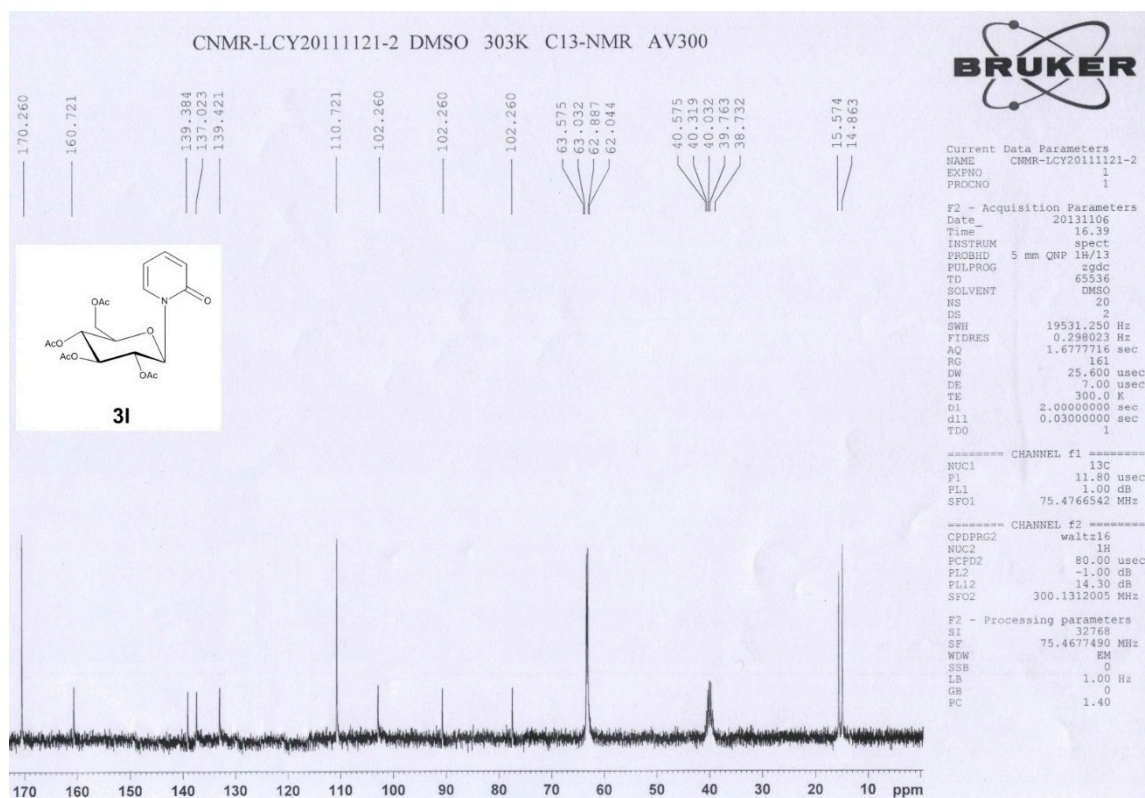6.13.  $C^{13}$ -NMR of Capecitabine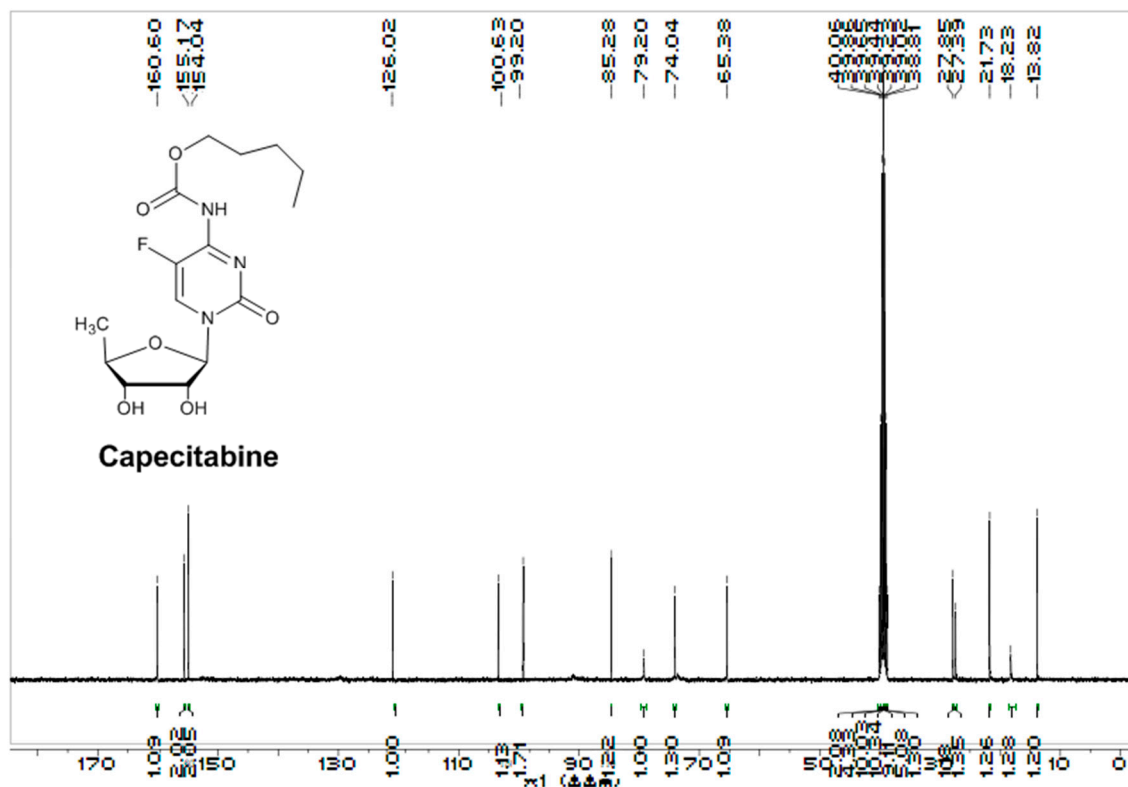

## 7. Mass Spectrometry

### 7.1. MS of 1a

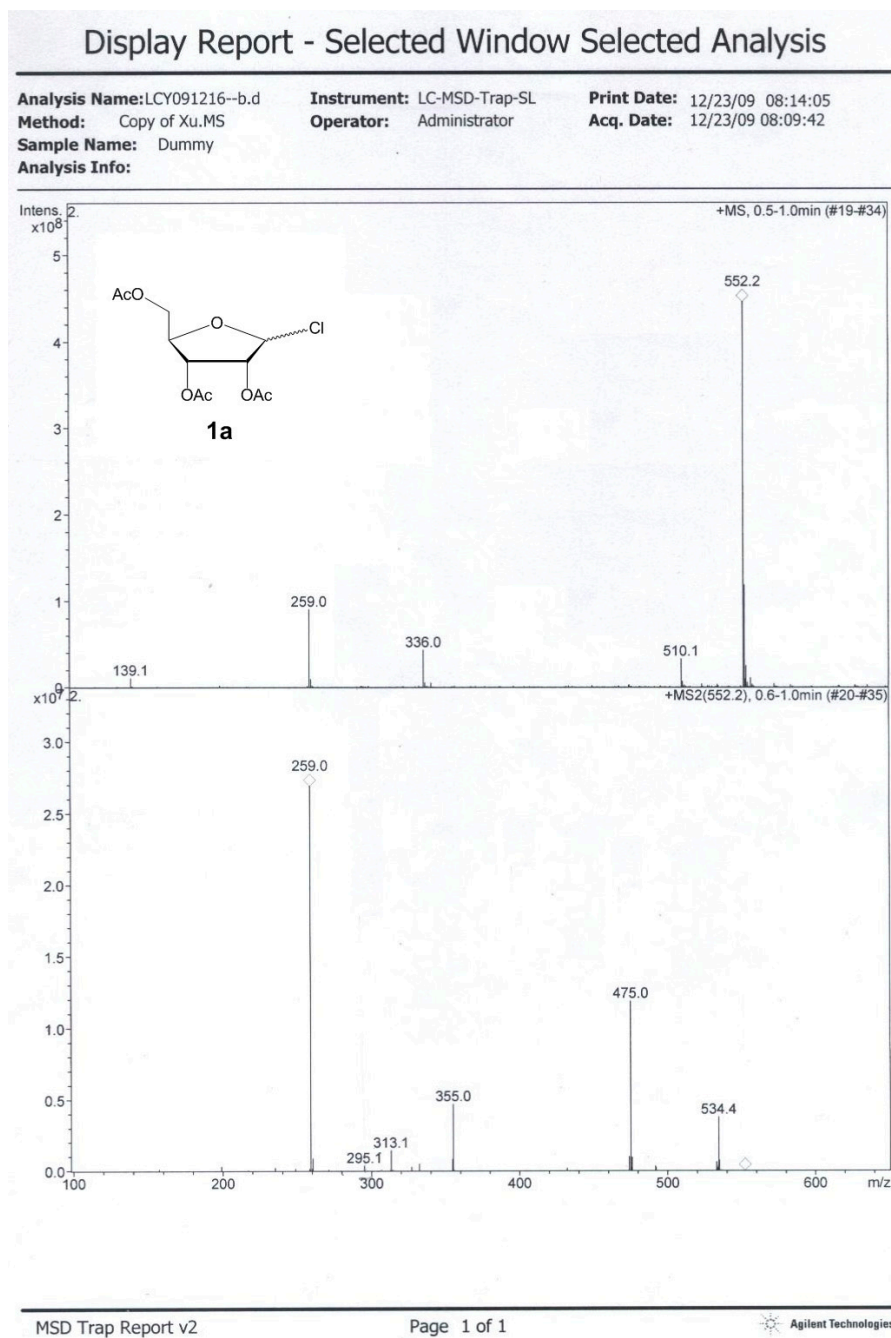

7.2. MS of **3a**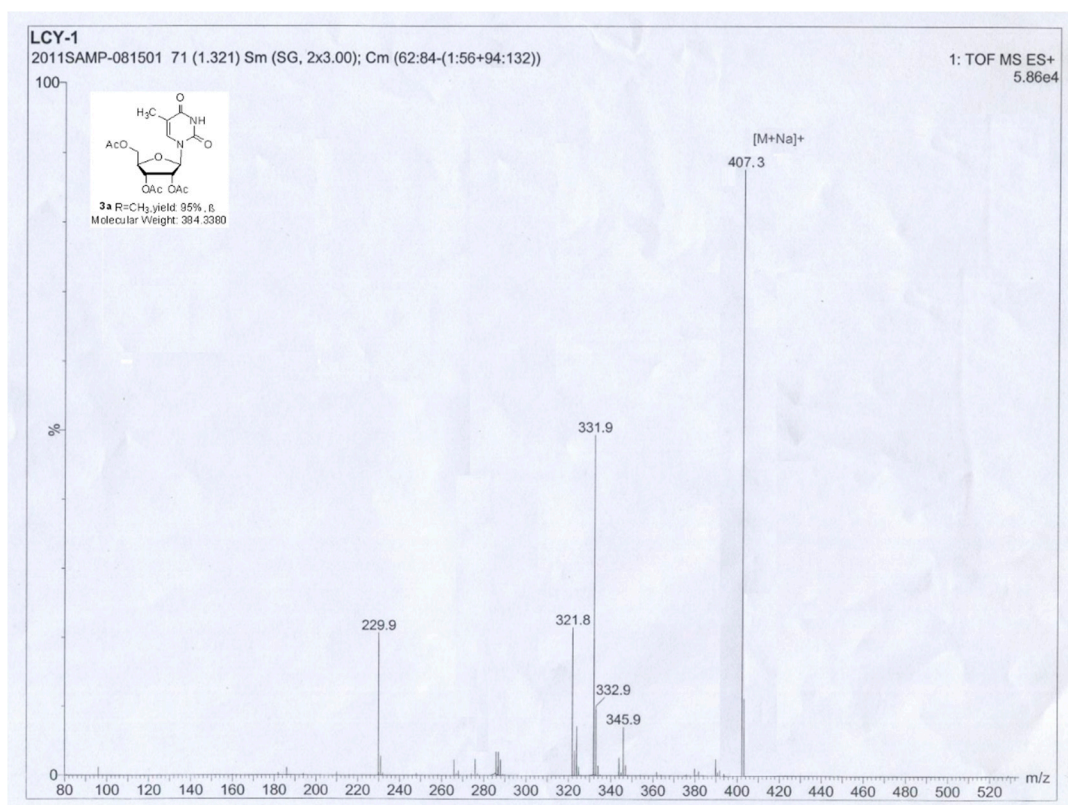7.3. MS of **3b**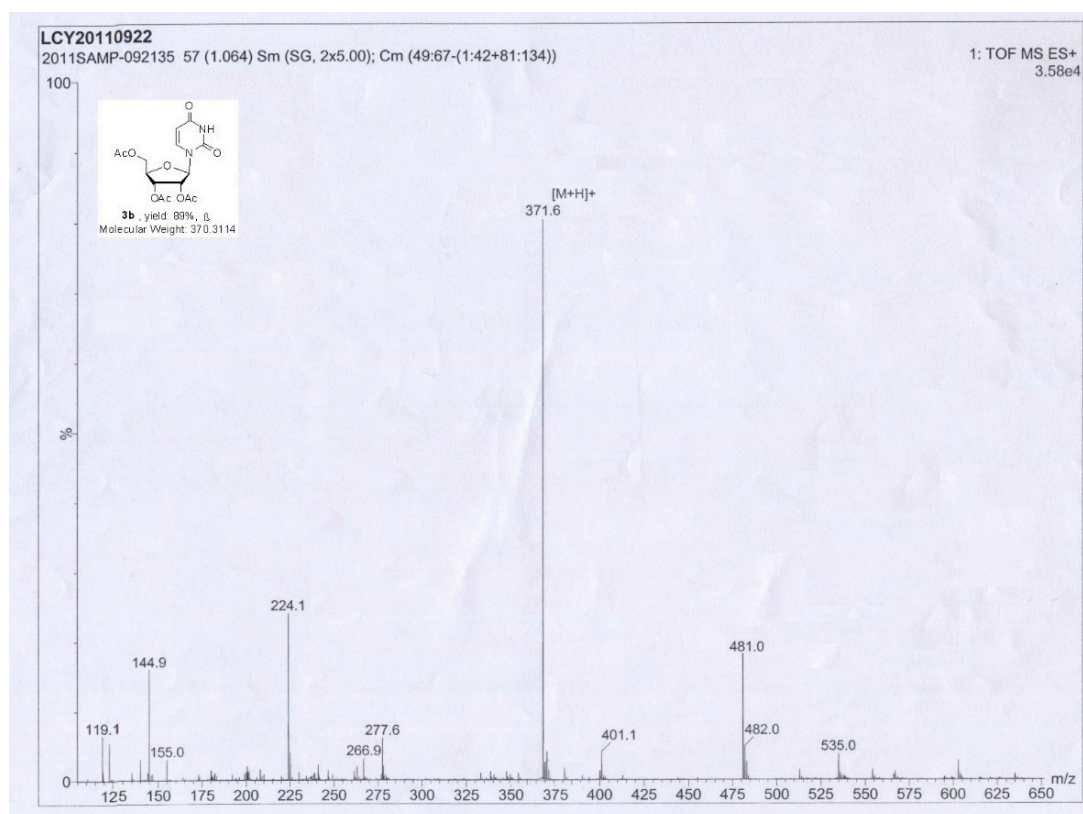

## 7.4. MS of 3c

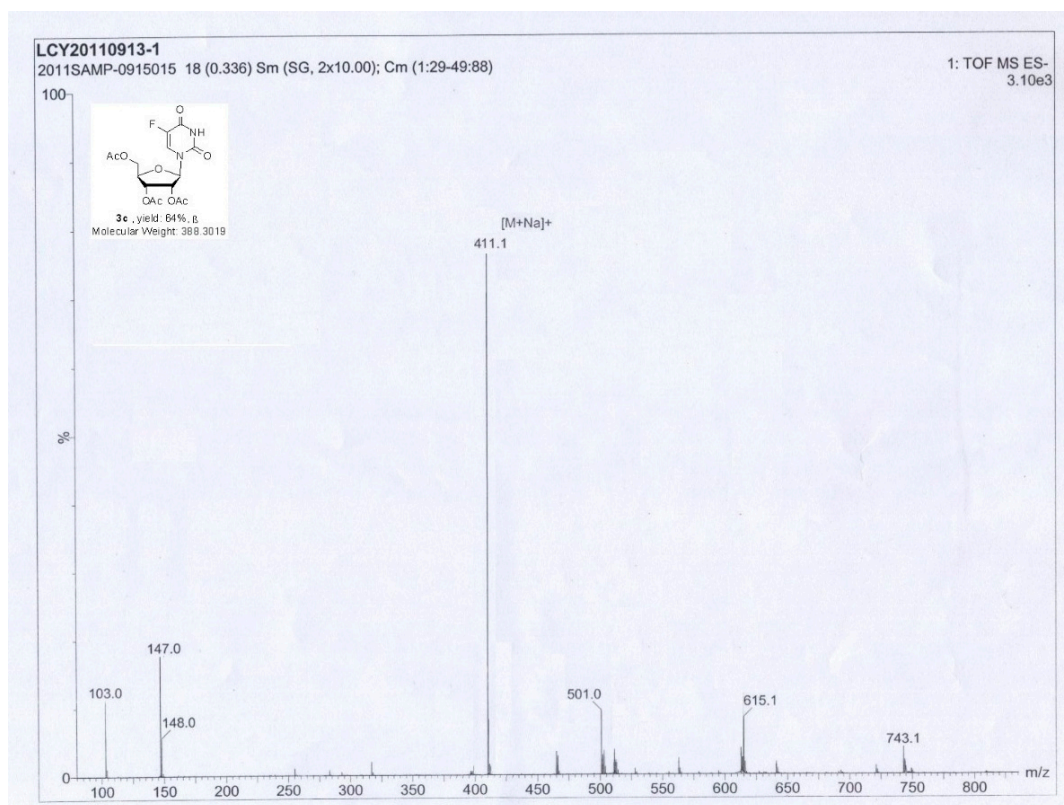

## 7.5. MS of 3d

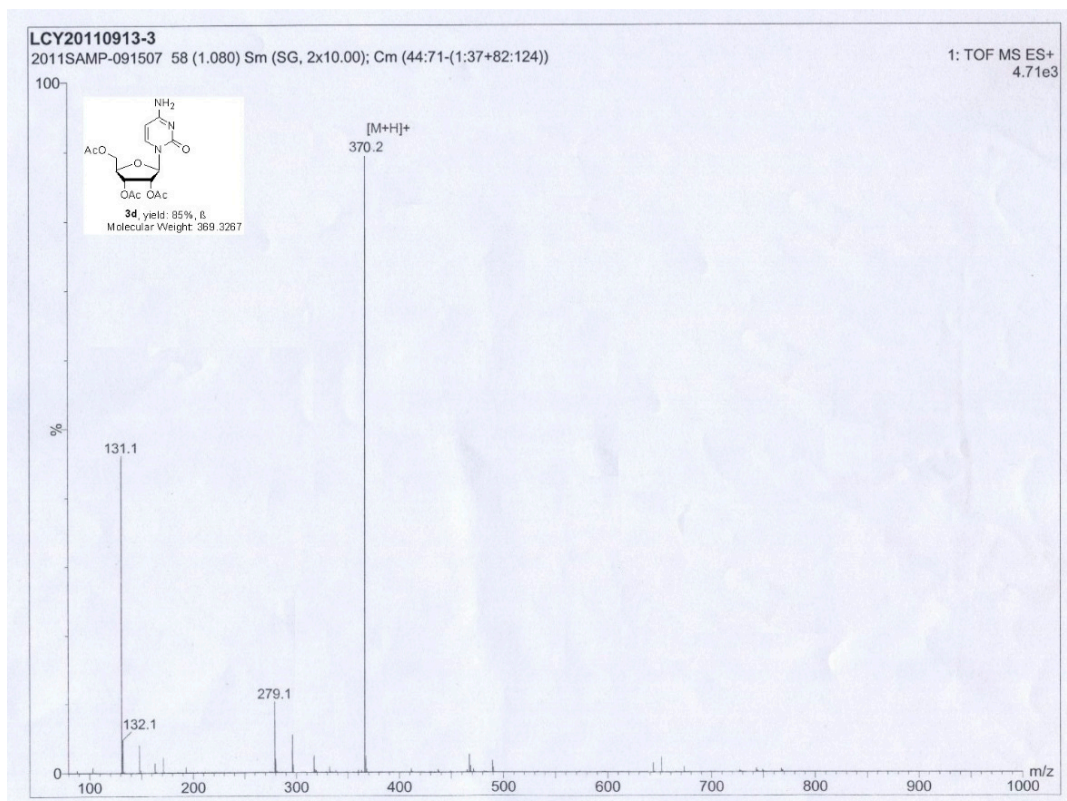

7.6. MS of **3e**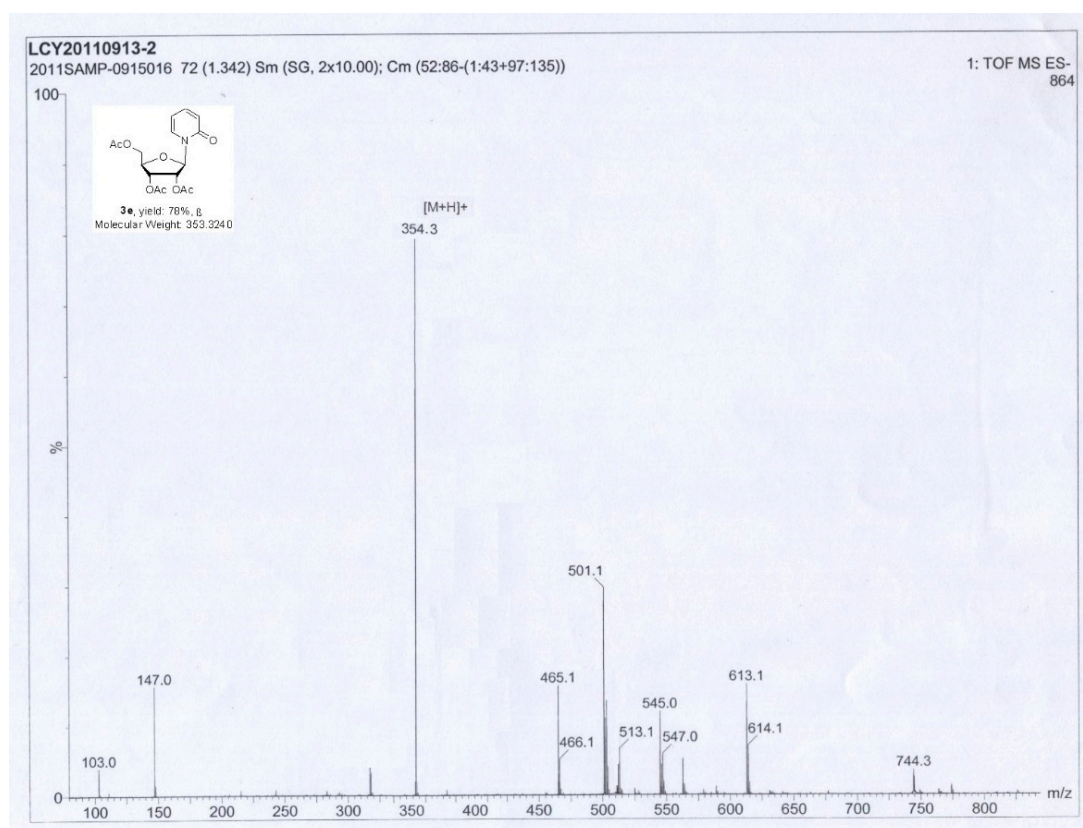7.7. MS of **3f**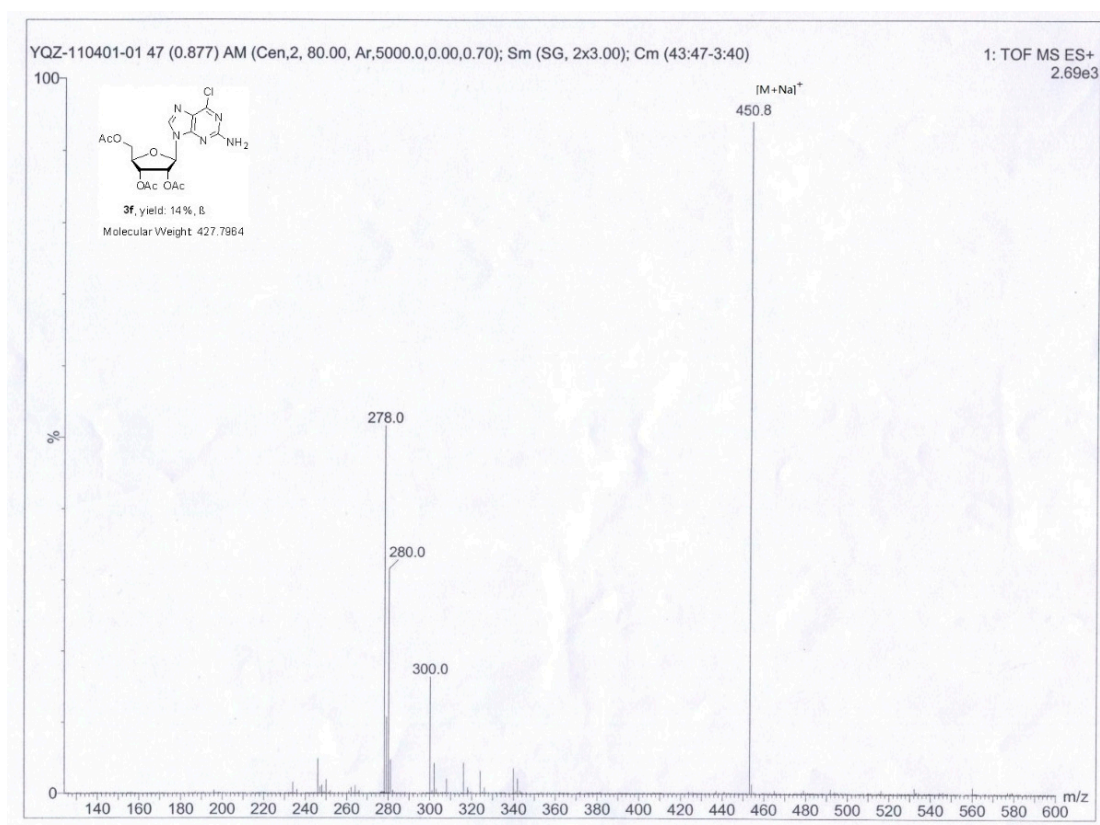

7.8. MS of **3g**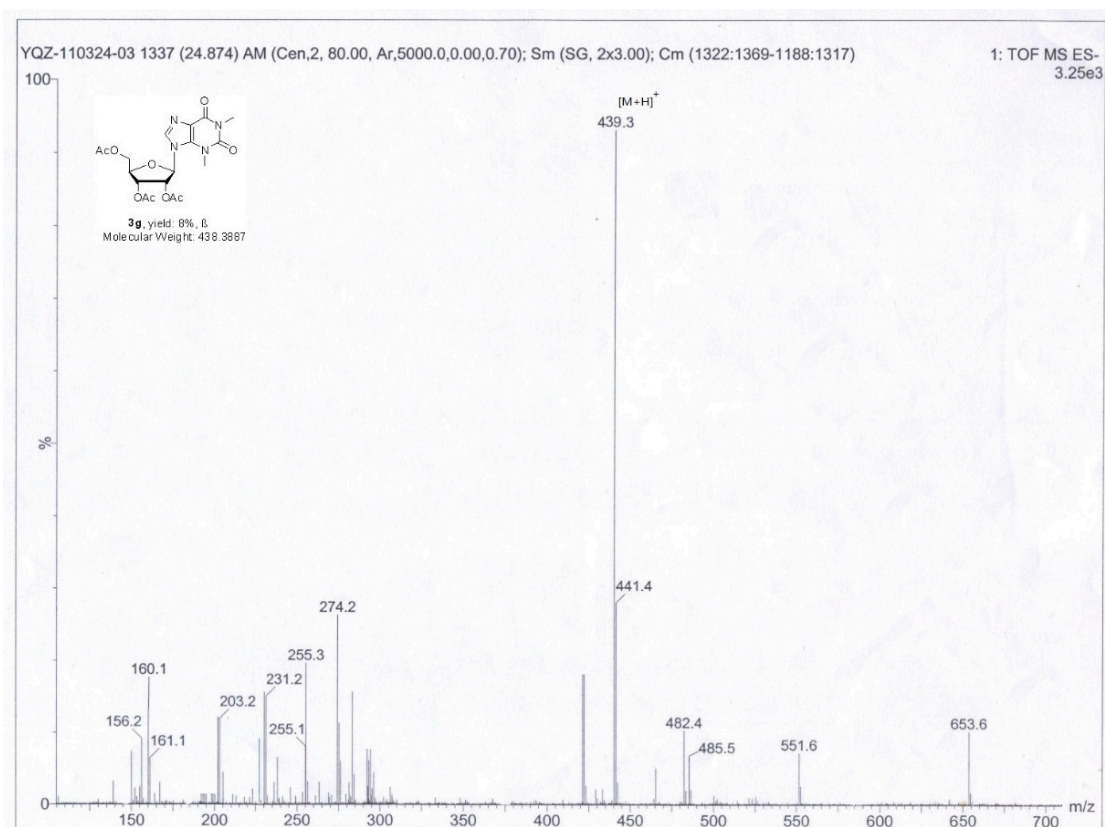7.9. MS of **3h**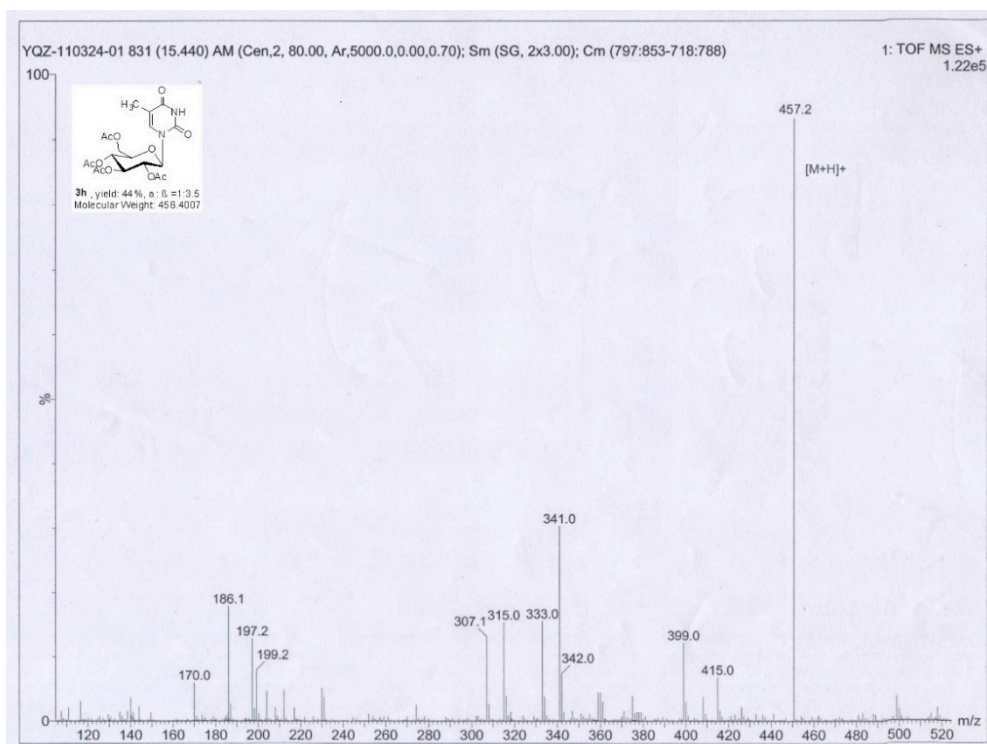

7.10. MS of **3i**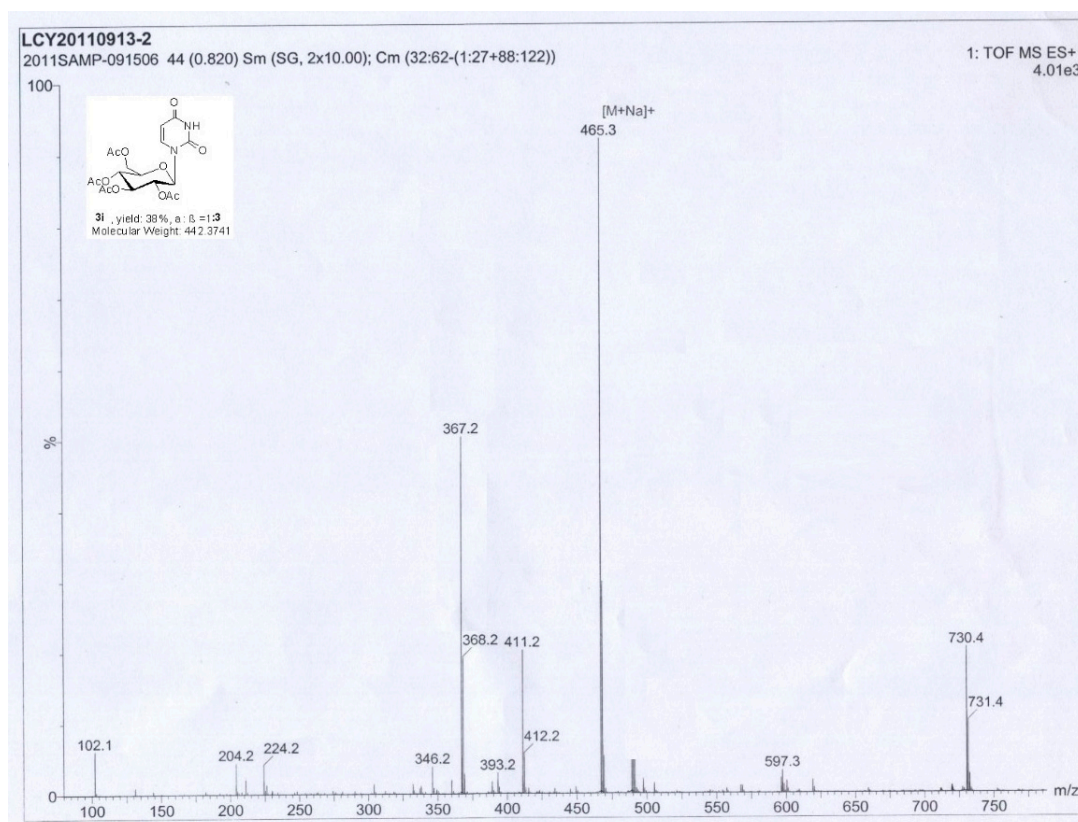7.11. MS of **3j**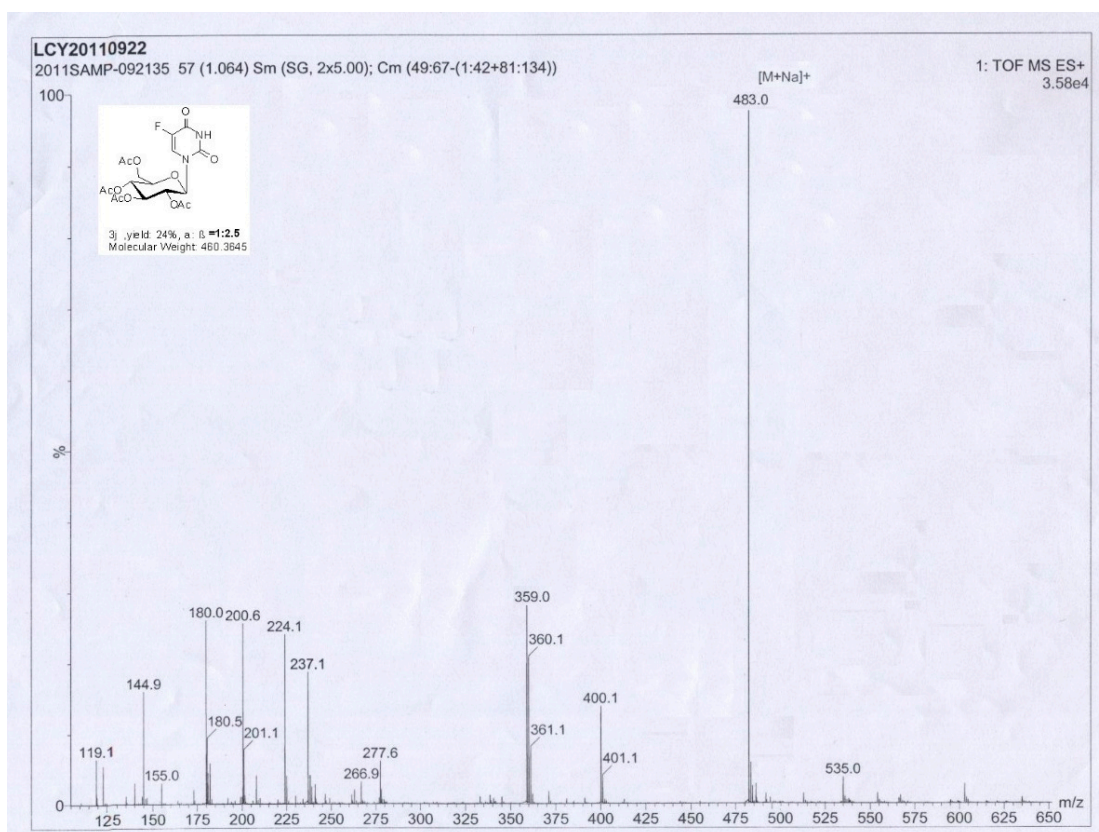

## 7.12. MS of 3k

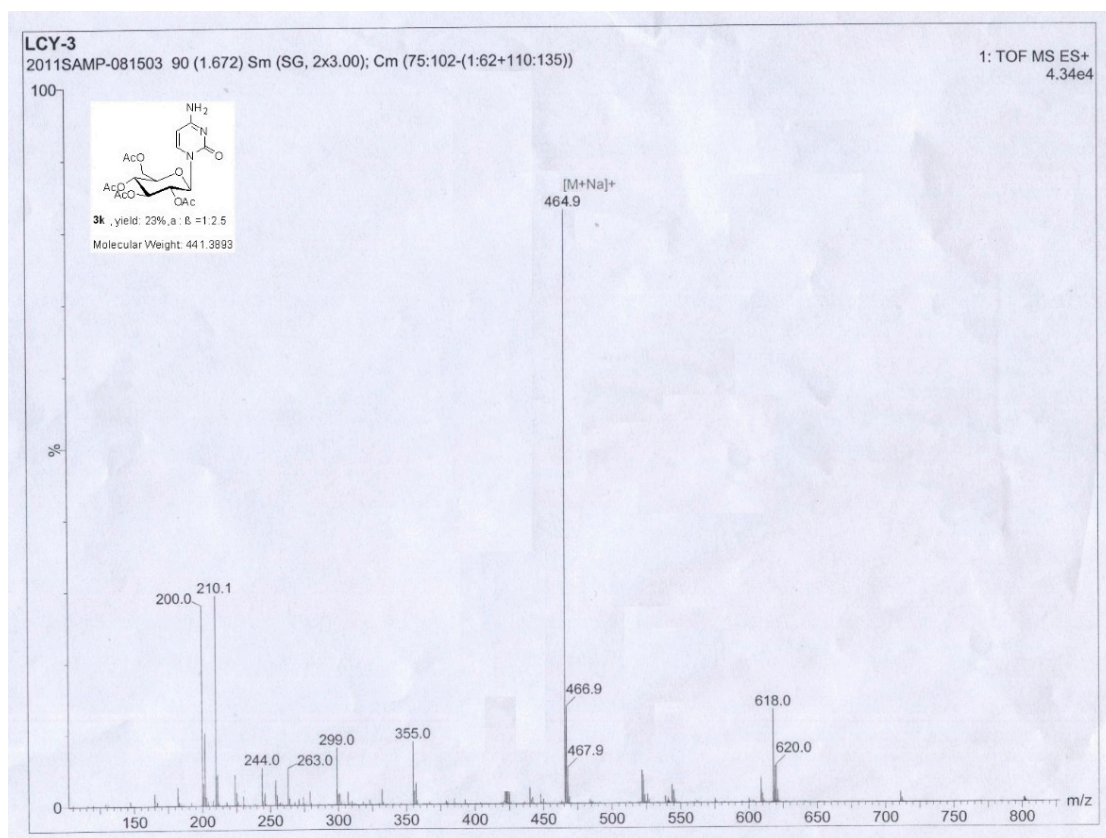

## 7.13. MS of 3l

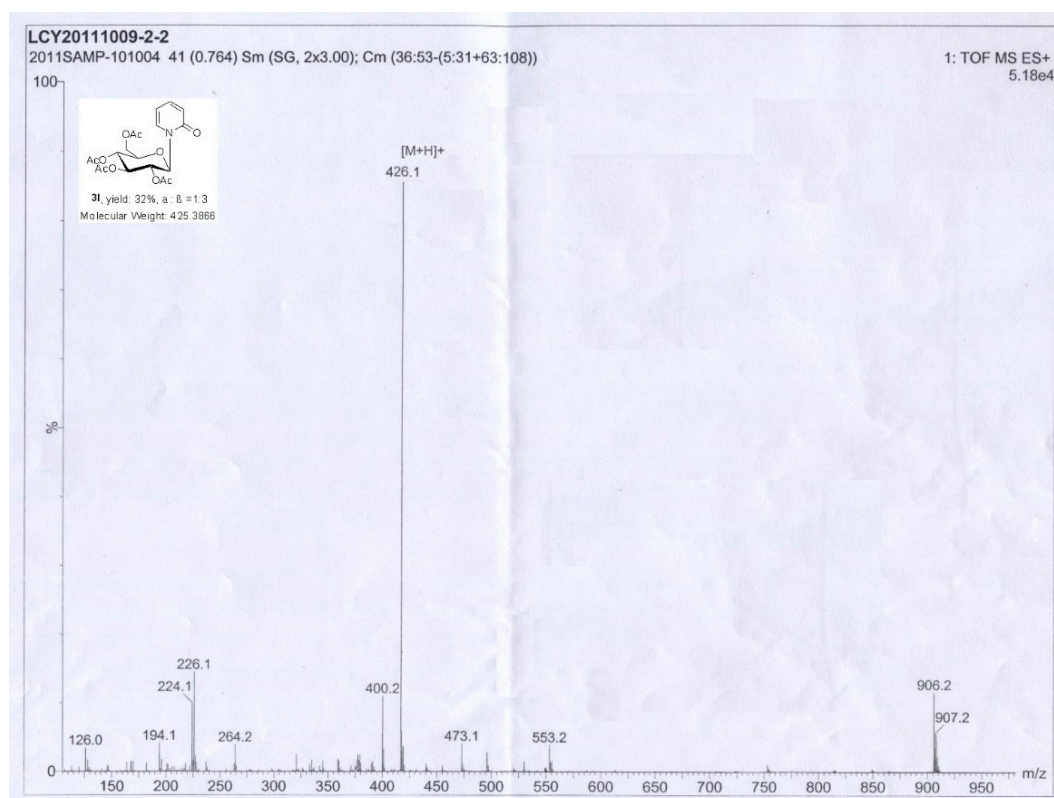

## 7.14. MS of Capecitabine

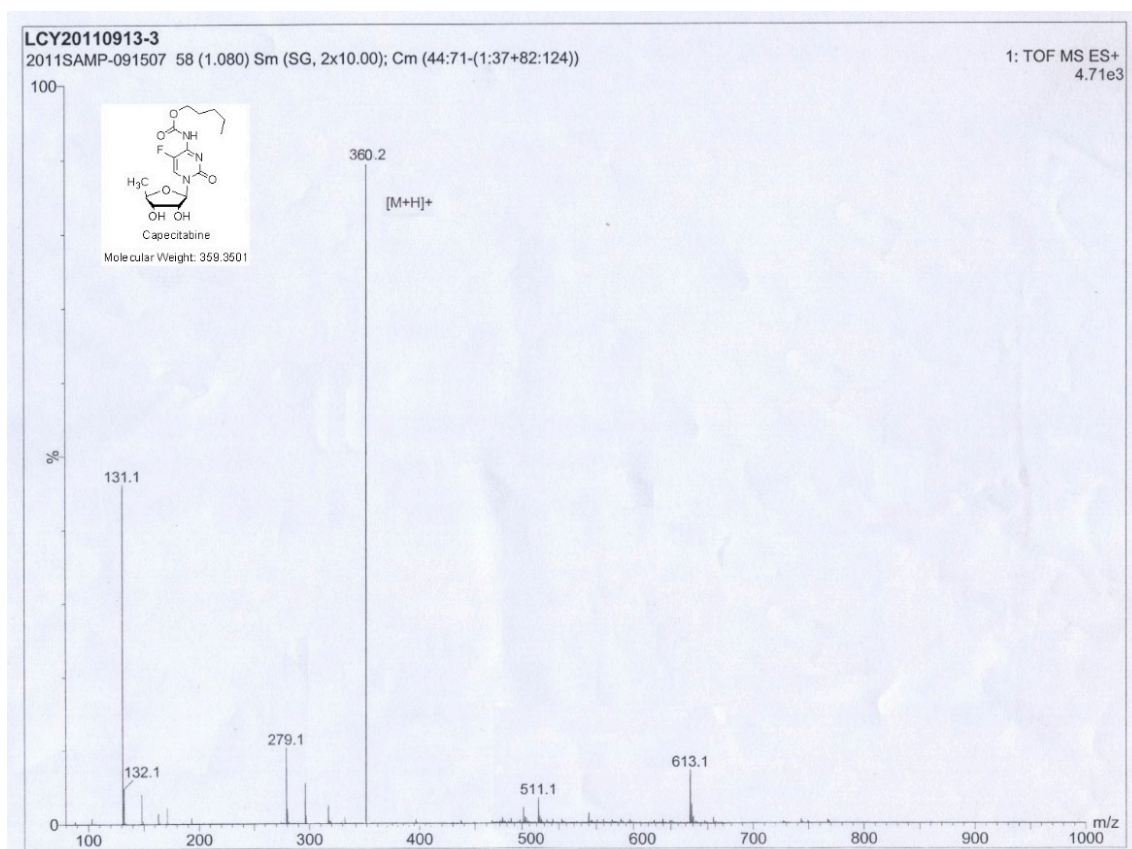

Supplement: s1 [file s1]
